# Supplementary material for: Design, synthesis, characterization and evaluation of the anticancer activity of water-soluble half-sandwich ruthenium(ii) arene halido complexes
Source: Royal Society of Chemistry journal article supplement (doi:10.1039/c9nj03663f), 2019-11-18
Supplement: c9nj03663f1.pdf [file c9nj03663f1.pdf]

# Design, Synthesis, Characterization and Evaluation of Anticancer Activity of Water-Soluble Half-sandwich Ruthenium (II) Arene Halido Complexes

Tanveer A. Khan,<sup>a</sup> Kishalay Bhar,<sup>a</sup> Ramalingam Thirumoorthi,<sup>a</sup> Tapta Kanchan Roy<sup>\*b</sup> and Anuj K. Sharma<sup>\*a</sup>

<sup>a</sup>Department of Chemistry, School of Chemical Sciences and Pharmacy, Central University of Rajasthan, Bandarsindri, District Ajmer, Rajasthan, 305817, India.

<sup>b</sup>Department of Chemistry & Chemical Sciences, Central University of Jammu, Rahya-Suchani (Bagla), District-Samba, Jammu-181143, (J&K) India.

## Supporting information

| Contents |              |                                                                                                                                  |
|----------|--------------|----------------------------------------------------------------------------------------------------------------------------------|
| 1.       | Figure S1.   | Data and graph obtained from elemental analysis of <b>1</b> .                                                                    |
| 2.       | Figure S2.   | Data and graph obtained from elemental analysis of <b>2</b> .                                                                    |
| 3.       | Figure S3.   | Data and graph obtained from elemental analysis of <b>3</b> .                                                                    |
| 4.       | Figure S4.   | IR spectrum of <b>1</b> recorded using KBr disc technique.                                                                       |
| 5.       | Figure S5.   | IR spectrum of <b>2</b> recorded using KBr disc technique.                                                                       |
| 6.       | Figure S6.   | IR spectrum of <b>3</b> recorded using KBr disc technique.                                                                       |
| 7.       | Figure S7.   | <sup>1</sup> H-NMR spectrum of <b>1</b> recorded in DMSO-d <sub>6</sub> .                                                        |
| 8.       | Figure S8.   | <sup>1</sup> H-NMR spectrum of <b>2</b> recorded in CDCl <sub>3</sub> .                                                          |
| 9.       | Figure S9.   | <sup>1</sup> H-NMR spectrum of <b>3</b> recorded in CDCl <sub>3</sub> .                                                          |
| 10.      | Figure S10.  | Aliphatic region of <sup>1</sup> H- <sup>1</sup> H-COSY NMR spectrum of <b>1</b> recorded in DMSO-d <sub>6</sub> .               |
| 11.      | Figure S11.  | <sup>1</sup> H- <sup>1</sup> H-COSY NMR spectrum of <b>1</b> recorded in DMSO-d <sub>6</sub> .                                   |
| 12.      | Figure S12.  | Aliphatic region of <sup>1</sup> H- <sup>1</sup> H-COSY NMR spectrum of <b>2</b> recorded in CDCl <sub>3</sub> .                 |
| 13.      | Figure S13.  | Aromatic region of <sup>1</sup> H- <sup>1</sup> H-COSY NMR spectrum of <b>2</b> recorded in CDCl <sub>3</sub> .                  |
| 14.      | Figure S14.  | <sup>1</sup> H- <sup>1</sup> H-COSY NMR spectrum of <b>2</b> recorded in CDCl <sub>3</sub> .                                     |
| 15.      | Figure S15.  | Aliphatic region of <sup>1</sup> H- <sup>1</sup> H-COSY NMR spectrum of <b>3</b> recorded in CDCl <sub>3</sub> .                 |
| 16.      | Figure S16.  | Aromatic region of <sup>1</sup> H- <sup>1</sup> H-COSY NMR spectrum of <b>3</b> recorded in CDCl <sub>3</sub> .                  |
| 17.      | Figure S17.  | <sup>1</sup> H- <sup>1</sup> H-COSY NMR spectrum of <b>3</b> recorded in CDCl <sub>3</sub> .                                     |
| 18.      | Figure S18.  | <sup>13</sup> C-NMR spectrum of <b>1</b> recorded in DMSO-d <sub>6</sub> .                                                       |
| 19.      | Figure S19.  | <sup>13</sup> C-NMR spectrum of <b>2</b> recorded in CDCl <sub>3</sub> .                                                         |
| 20.      | Figure S20.  | <sup>13</sup> C-NMR spectrum of <b>3</b> recorded in CDCl <sub>3</sub> .                                                         |
| 21.      | Figure S21.  | ESI-Mass spectrum of <b>1</b> recorded in methanol.                                                                              |
| 22.      | Figure S22.  | ESI-Mass spectrum of <b>2</b> recorded in methanol.                                                                              |
| 23.      | Figure S23.  | ESI-Mass spectrum of <b>3</b> recorded in methanol.                                                                              |
| 24.      | Figure S24.  | UV- Visible absorption spectra of <b>1</b> (26.66 μM) recorded in PBS (pH = 7.4) after 0, 12, 24 and 48 h at 298 K.              |
| 25.      | Figure S25A. | UV-Visible absorption spectra of <b>2</b> (26.66 μM) recorded in PBS (pH = 7.4) after 0, 12, 24 and 48 h at 298 K.               |
| 26.      | Figure S25B. | UV-Visible absorption spectra of <b>2</b> (26.66 μM) recorded in PBS (pH = 7.4) after 0, 5, 10, 30, 60, 90 and 120 min at 298 K. |
| 27.      | Figure S26.  | UV-Visible absorption spectra of <b>3</b> (26.66 μM) recorded in PBS (pH = 7.4) after 0, 12, 24 and 48 h at 298 K.               |
| 28.      | Figure S27.  | UV-Visible absorption spectra of <b>1</b> , <b>2</b> and <b>3</b> (26.66 μM) recorded in DMSO at 298 K.                          |
| 29.      | Figure S28.  | UV-Visible absorption spectra of <b>1</b> (26.66 μM) recorded in DMSO after 0, 2, 12, 24 and 48 h at                             |

|     |              |                                                                                                                                                                                                                                                                                                          |
|-----|--------------|----------------------------------------------------------------------------------------------------------------------------------------------------------------------------------------------------------------------------------------------------------------------------------------------------------|
|     |              | 298 K.                                                                                                                                                                                                                                                                                                   |
| 30. | Figure S29.  | UV-Visible absorption spectra of <b>2</b> (26.66 $\mu$ M) recorded in DMSO after 0, 2, 12, 24 and 48 h at 298 K.                                                                                                                                                                                         |
| 31. | Figure S30.  | UV-Visible absorption spectra of <b>3</b> (26.66 $\mu$ M) recorded in DMSO after 0, 2, 12, 24 and 48 h at 298 K.                                                                                                                                                                                         |
| 32. | Figure S31.  | $^1\text{H}$ -NMR spectrum of <b>1</b> recorded in DMSO- $d_6$ after 0, 0.5, 2, 6, 24 and 48 h at 298 K.                                                                                                                                                                                                 |
| 33. | Figure S32.  | $^1\text{H}$ -NMR spectrum of <b>2</b> recorded in DMSO- $d_6$ after 0 h, 10 min., 0.5 h, 2 h, 6 h, 24 h and 48 h at 298 K.                                                                                                                                                                              |
| 34. | Figure S33.  | $^1\text{H}$ -NMR spectrum of <b>3</b> recorded in DMSO- $d_6$ after 0, 0.5, 2, 6, 24 and 48 h at 298 K.                                                                                                                                                                                                 |
| 35. | Figure S34.  | UV-Visible absorption spectra of <b>L</b> <sub>1</sub> , <b>L</b> <sub>2</sub> , <b>L</b> <sub>3</sub> and Ru(p-cymene)dimer (26.66 $\mu$ M) recorded in DMSO at 298 K.                                                                                                                                  |
| 36. | Figure S35.  | UV-Visible absorption spectra of <b>L</b> <sub>1</sub> (26.66 $\mu$ M) recorded in DMSO after 0, 12, 24 and 48 h at 298 K.                                                                                                                                                                               |
| 37. | Figure S36.  | UV-Visible absorption spectra of <b>L</b> <sub>2</sub> (26.66 $\mu$ M) recorded in DMSO after 0, 12, 24 and 48 h at 298 K.                                                                                                                                                                               |
| 38. | Figure S37.  | UV-Visible absorption spectra of <b>L</b> <sub>3</sub> (26.66 $\mu$ M) recorded in DMSO after 0, 12, 24 and 48 h at 298 K.                                                                                                                                                                               |
| 39. | Figure S38.  | UV-Visible absorption spectra of Ru(p-cymene)dimer (26.66 $\mu$ M) recorded in DMSO after 0, 12, 24 and 48 h at 298 K.                                                                                                                                                                                   |
| 40. | Figure S39.  | UV-Visible absorption spectra of Ru(p-cymene)dimer (26.66 $\mu$ M) recorded in PBS (pH = 7.4) after 0, 12, 24 and 48 h at 298 K.                                                                                                                                                                         |
| 41. | Figure S40.  | Demonstrating intermolecular $\pi$ - $\pi$ stacking interactions for <b>1</b> ; [Hydrogen atoms and solvent molecules omitted for clarity].                                                                                                                                                              |
| 42. | Figure S41.  | Showing C-H $\cdots$ Cl and N-H $\cdots$ Cl hydrogen bonded network in crystal structure of <b>1</b> .                                                                                                                                                                                                   |
| 43. | Table S1.    | Selected bond distances and bond angles ( $\text{\AA}$ , $^\circ$ ) observed in crystal structure of <b>1</b> .                                                                                                                                                                                          |
| 44. | Table S2.    | $\pi\cdots\pi$ interaction parameters ( $\text{\AA}$ , $^\circ$ ) associated with crystal structure of <b>1</b> .                                                                                                                                                                                        |
| 45. | Table S3.    | Hydrogen bond parameters ( $\text{\AA}$ , $^\circ$ ) associated with crystal structure of <b>1</b> .                                                                                                                                                                                                     |
| 46. | Figure S42.  | Cyclic voltammograms of <b>1</b> (1 mM) solution in CH <sub>3</sub> CN with 0.1 M [nBu <sub>4</sub> N][ClO <sub>4</sub> ] at scan rates: 100 mV s <sup>-1</sup> , 200 mV s <sup>-1</sup> , 500 mV s <sup>-1</sup> , 1000 mV s <sup>-1</sup> at room temperature (Range: 0.5 to 1.5 V).                   |
| 47. | Figure S43.  | Cyclic voltammograms of <b>2</b> (1 mM) solution in CH <sub>3</sub> CN with 0.1 M [nBu <sub>4</sub> N][ClO <sub>4</sub> ] at scan rates: 100 mV s <sup>-1</sup> , 200 mV s <sup>-1</sup> , 500 mV s <sup>-1</sup> , 1000 mV s <sup>-1</sup> at room temperature (Range: 0.5 to 1.95 V and 0.5 to 1.5 V). |
| 48. | Figure S44.  | Cyclic voltammograms of <b>3</b> (1 mM) solution in CH <sub>3</sub> CN with 0.1 M [nBu <sub>4</sub> N][ClO <sub>4</sub> ] at scan rates: 100 mV s <sup>-1</sup> , 200 mV s <sup>-1</sup> , 500 mV s <sup>-1</sup> , 1000 mV s <sup>-1</sup> at room temperature (Range: 0.5 to 2.0 V and 0.5 to 1.5 V).  |
| 49. | Figure S45A. | DFT optimized structures of the global minima (with and without solvent) with frontier MOs of <b>1</b> .                                                                                                                                                                                                 |
| 50. | Figure S45B. | DFT optimized structures of the global minima (with and without solvent) with frontier MOs of <b>2</b> .                                                                                                                                                                                                 |
| 51. | Figure S46.  | Molecular docked model of <b>1</b> (right column) and <b>2</b> (left column) with B-DNA optimized at PM6 method.                                                                                                                                                                                         |
| 52. | Table S4.    | Selected bond lengths ( $\text{\AA}$ ) and bond angles ( $^\circ$ ) of <b>1</b> in DFT optimized structures (at B3LYP/6-31G(d,p)/LanL2DZ level of theory) with and without solvent.                                                                                                                      |
| 53. | Table S5.    | Selected bond lengths ( $\text{\AA}$ ) and bond angles ( $^\circ$ ) of <b>2</b> in DFT optimized structures (at B3LYP/6-31G(d,p)/LanL2DZ level of theory) of with and without solvent for four different conformers <b>A</b> , <b>B</b> , <b>C</b> and <b>D</b> .                                        |
| 54. | Figure S47.  | UV-Visible absorption titration spectra of <b>2</b> (10 $\mu$ M; Milli-Q water) with the addition of varying concentrations of CT-DNA (0-15 $\mu$ M; T <sub>10</sub> E <sub>1</sub> buffer, pH $\sim$ 7.6) at 298 K.                                                                                     |
| 55. | Figure S48.  | UV-Visible absorption titration spectra of <b>3</b> (10 $\mu$ M; Milli-Q water) with the addition of varying concentrations of CT-DNA (0-15 $\mu$ M; T <sub>10</sub> E <sub>1</sub> buffer, pH $\sim$ 7.6) at 298 K.                                                                                     |
| 56. | Figure S49.  | Plot for the calculation of equilibrium binding constant ( $K_b$ ) associated with the titration of <b>2</b> and CT-DNA at 298 K.                                                                                                                                                                        |
| 57. | Figure S50.  | Plot for the calculation of equilibrium binding constant ( $K_b$ ) associated with the titration of <b>3</b> and CT-DNA at 298 K.                                                                                                                                                                        |
| 58. | Figure S51.  | Plot to the model of Bard and Thorp associated with the titration of <b>2</b> and CT-DNA at 298 K.                                                                                                                                                                                                       |
| 59. | Figure S52.  | Plot to the model of Bard and Thorp associated with the titration of <b>3</b> and CT-DNA at 298 K.                                                                                                                                                                                                       |
| 60. | Table S6.    | Molar absorptivity changes ( $\Delta\epsilon$ ) for UV-Visible absorption studies of DNA binding with complex <b>1-3</b> .                                                                                                                                                                               |

|     |             |                                                                                                                                                                                                                                                                                                                                         |
|-----|-------------|-----------------------------------------------------------------------------------------------------------------------------------------------------------------------------------------------------------------------------------------------------------------------------------------------------------------------------------------|
| 61. | Figure S53. | UV-Visible absorption titration spectra of <b>L</b> <sub>1</sub> (25 $\mu$ M; DMSO:Water (5:100 v/v)) with the addition of varying concentrations of CT-DNA ( $0-4.3 \times 10^{-7}$ M; T <sub>10</sub> E <sub>1</sub> buffer, pH $\sim$ 7.6) at 298 K.                                                                                 |
| 62. | Figure S54. | UV-Visible absorption titration spectra of <b>L</b> <sub>2</sub> (25 $\mu$ M; DMSO:Water (5:100 v/v)) with the addition of varying concentrations of CT-DNA ( $0-4.3 \times 10^{-7}$ M; T <sub>10</sub> E <sub>1</sub> buffer, pH $\sim$ 7.6) at 298 K.                                                                                 |
| 63. | Figure S55. | UV-Visible absorption titration spectra of <b>L</b> <sub>3</sub> (25 $\mu$ M; DMSO:Water (5:100 v/v)) with the addition of varying concentrations of CT-DNA ( $0-4.3 \times 10^{-7}$ M; T <sub>10</sub> E <sub>1</sub> buffer, pH $\sim$ 7.6) at 298 K.                                                                                 |
| 64. | Figure S56. | Plot for the calculation of equilibrium binding constant ( $K_b$ ) associated with the titration of <b>L</b> <sub>1</sub> and CT-DNA at 298 K.                                                                                                                                                                                          |
| 65. | Figure S57. | Plot for the calculation of equilibrium binding constant ( $K_b$ ) associated with the titration of <b>L</b> <sub>2</sub> and CT-DNA at 298 K.                                                                                                                                                                                          |
| 66. | Figure S58. | Plot for the calculation of equilibrium binding constant ( $K_b$ ) associated with the titration of <b>L</b> <sub>3</sub> and CT-DNA at 298 K.                                                                                                                                                                                          |
| 67. | Figure S59. | Plot to the model of Bard and Thorp associated with the titration of <b>L</b> <sub>1</sub> and CT-DNA at 298 K.                                                                                                                                                                                                                         |
| 68. | Figure S60. | Plot to the model of Bard and Thorp associated with the titration of <b>L</b> <sub>2</sub> and CT-DNA at 298 K.                                                                                                                                                                                                                         |
| 69. | Figure S61. | Plot to the model of Bard and Thorp associated with the titration of <b>L</b> <sub>3</sub> and CT-DNA at 298 K.                                                                                                                                                                                                                         |
| 70. | Table S7.   | Data for UV-Visible absorption studies for DNA binding with ligand <b>L</b> <sub>1</sub> - <b>L</b> <sub>3</sub> .                                                                                                                                                                                                                      |
| 71. | Figure S62. | Molecular fluorescence emission profile associated with titration of EthBr-DNA (35 $\mu$ M; T <sub>10</sub> E <sub>1</sub> buffer, pH $\sim$ 7.6; $\lambda_{ex}$ . 480 nm; $\lambda_{em}$ . 597 nm) with the addition of varying concentrations of <b>2</b> (0-360 $\mu$ M; Milli-Q water) at 298 K.                                    |
| 72. | Figure S63. | Molecular fluorescence emission profile associated with titration of EthBr-DNA (35 $\mu$ M; T <sub>10</sub> E <sub>1</sub> buffer, pH $\sim$ 7.6; $\lambda_{ex}$ . 480 nm; $\lambda_{em}$ . 597 nm) with the addition of varying concentrations of <b>3</b> (0-270 $\mu$ M; Milli-Q water) at 298 K.                                    |
| 73. | Figure S64. | Stern-Volmer plot for the calculation of quenching constant ( $K_{SV}$ ) associated with the titration of EthBr-DNA and <b>1</b> at 298 K.                                                                                                                                                                                              |
| 74. | Figure S65. | Stern-Volmer plot for the calculation of quenching constant ( $K_{SV}$ ) associated with the titration of EthBr-DNA and <b>2</b> at 298 K.                                                                                                                                                                                              |
| 75. | Figure S66. | Stern-Volmer plot for the calculation of quenching constant ( $K_{SV}$ ) associated with the titration of EthBr-DNA and <b>3</b> at 298 K.                                                                                                                                                                                              |
| 76. | Figure S67. | Scatchard plot for the calculation of association constant ( $K_a$ ) related with the interaction of EthBr-DNA and <b>1</b> at 298 K.                                                                                                                                                                                                   |
| 77. | Figure S68. | Scatchard plot for the calculation of association constant ( $K_a$ ) related with the interaction of EthBr-DNA and <b>2</b> at 298 K.                                                                                                                                                                                                   |
| 78. | Figure S69. | Scatchard plot for the calculation of association constant ( $K_a$ ) related with the interaction of EthBr-DNA and <b>3</b> at 298 K.                                                                                                                                                                                                   |
| 79. | Figure S70. | Molecular fluorescence emission profile associated with titration of EthBr-DNA (35 $\mu$ M; T <sub>10</sub> E <sub>1</sub> buffer, pH $\sim$ 7.6; $\lambda_{ex}$ . 480 nm; $\lambda_{em}$ . 597 nm) with the addition of varying concentrations of <b>L</b> <sub>1</sub> ( $0-7.24 \times 10^{-4}$ M; DMSO:Water (5:100 v/v)) at 298 K. |
| 80. | Figure S71. | Molecular fluorescence emission profile associated with titration of EthBr-DNA (35 $\mu$ M; T <sub>10</sub> E <sub>1</sub> buffer, pH $\sim$ 7.6; $\lambda_{ex}$ . 480 nm; $\lambda_{em}$ . 597 nm) with the addition of varying concentrations of <b>L</b> <sub>3</sub> ( $0-4.42 \times 10^{-4}$ M; DMSO:Water (5:100 v/v)) at 298 K. |
| 81. | Figure S72. | Molecular fluorescence emission profile associated with titration of EthBr-DNA (35 $\mu$ M; T <sub>10</sub> E <sub>1</sub> buffer, pH $\sim$ 7.6; $\lambda_{ex}$ . 480 nm; $\lambda_{em}$ . 597 nm) with the addition of varying concentrations of Ru(p-cymene)dimer ( $0-6.03 \times 10^{-4}$ M; Milli-Q water) at 298 K.              |
| 82. | Figure S73. | Stern-Volmer plot for the calculation of quenching constant ( $K_{SV}$ ) associated with the titration of EthBr-DNA and <b>L</b> <sub>1</sub> at 298 K.                                                                                                                                                                                 |
| 83. | Figure S74. | Stern-Volmer plot for the calculation of quenching constant ( $K_{SV}$ ) associated with the titration of EthBr-DNA and <b>L</b> <sub>3</sub> at 298 K.                                                                                                                                                                                 |
| 84. | Figure S75. | Stern-Volmer plot for the calculation of quenching constant ( $K_{SV}$ ) associated with the titration of EthBr-DNA and Ru(p-cymene)dimer at 298 K.                                                                                                                                                                                     |
| 85. | Figure S76. | Scatchard plot for the calculation of association constant ( $K_a$ ) related with the interaction of EthBr-DNA and <b>L</b> <sub>1</sub> at 298 K.                                                                                                                                                                                      |
| 86. | Figure S77. | Scatchard plot for the calculation of association constant ( $K_a$ ) related with the interaction of EthBr-DNA and <b>L</b> <sub>3</sub> at 298 K.                                                                                                                                                                                      |
| 87. | Figure S78. | Scatchard plot for the calculation of association constant ( $K_a$ ) related with the interaction of EthBr-DNA and Ru(p-cymene)dimer at 298 K.                                                                                                                                                                                          |
| 88. | Table S8.   | Data for emission spectroscopic studies for DNA binding with ligand <b>L</b> <sub>1</sub> , <b>L</b> <sub>3</sub> and Ru(p-cymene)dimer.                                                                                                                                                                                                |
| 89. | Figure S79. | Molecular fluorescence emission profile associated with titration of BSA (0.15 $\mu$ M; PBS, pH $\sim$ 7.4; $\lambda_{ex}$ . 280 nm; $\lambda_{em}$ . 344 nm) with the addition of varying concentrations of <b>2</b> (0-16 $\mu$ M; PBS, pH $\sim$ 7.4) at 298 K.                                                                      |

|      |             |                                                                                                                                                                                                                                                                                              |
|------|-------------|----------------------------------------------------------------------------------------------------------------------------------------------------------------------------------------------------------------------------------------------------------------------------------------------|
| 90.  | Figure S80. | Molecular fluorescence emission profile associated with titration of BSA (0.15 $\mu$ M; PBS, pH $\sim$ 7.4; $\lambda_{ex}$ . 280 nm; $\lambda_{em}$ . 344 nm) with the addition of varying concentrations of <b>3</b> (0-16 $\mu$ M; PBS, pH $\sim$ 7.4) at 298 K.                           |
| 91.  | Figure S81. | Molecular fluorescence emission profile associated with titration of BSA (0.15 $\mu$ M; PBS, pH $\sim$ 7.4; $\lambda_{ex}$ . 280 nm; $\lambda_{em}$ . 344 nm) with the addition of varying concentrations of Ru(p-cymene)dimer (0-16 $\mu$ M; PBS, pH $\sim$ 7.4) at 298 K.                  |
| 92.  | Figure S82. | Stern-Volmer plot for the calculation of quenching constant ( $K_{SV}$ ) associated with the interaction of BSA and <b>1</b> at 298 K.                                                                                                                                                       |
| 93.  | Figure S83. | Stern-Volmer plot for the calculation of quenching constant ( $K_{SV}$ ) associated with the interaction of BSA and <b>2</b> at 298 K.                                                                                                                                                       |
| 94.  | Figure S84. | Stern-Volmer plot for the calculation of quenching constant ( $K_{SV}$ ) associated with the interaction of BSA and <b>3</b> at 298 K.                                                                                                                                                       |
| 95.  | Figure S85. | Stern-Volmer plot for the calculation of quenching constant ( $K_{SV}$ ) associated with the interaction of BSA and Ru(p-cymene)dimer at 298 K.                                                                                                                                              |
| 96.  | Figure S86. | Scatchard plot for the calculation of binding constant ( $K_b$ ) associated with the interaction of BSA and <b>1</b> at 298 K.                                                                                                                                                               |
| 97.  | Figure S87. | Scatchard plot for the calculation of binding constant ( $K_b$ ) associated with the interaction of BSA and <b>2</b> at 298 K.                                                                                                                                                               |
| 98.  | Figure S88. | Scatchard plot for the calculation of binding constant ( $K_b$ ) associated with the interaction of BSA and <b>3</b> at 298 K.                                                                                                                                                               |
| 99.  | Figure S89. | Scatchard plot for the calculation of binding constant ( $K_b$ ) associated with the interaction of BSA and Ru(p-cymene)dimer at 298 K.                                                                                                                                                      |
| 100. | Table S9.   | Data for emission spectroscopic studies for BSA interaction with Ru(p-cymene)dimer.                                                                                                                                                                                                          |
| 101. | Figure S90. | UV-Visible absorption spectra of BSA (10 $\mu$ M; PBS, pH $\sim$ 7.4) in presence of <b>1-3</b> (10 $\mu$ M; PBS, pH $\sim$ 7.4) at 298 K.                                                                                                                                                   |
| 102. | Figure S91. | UV-Visible absorption spectra of BSA (10 $\mu$ M; PBS, pH $\sim$ 7.4) in presence of <b>L<sub>1</sub>, L<sub>2</sub>, L<sub>3</sub></b> and Ru(p-cymene)dimer (10 $\mu$ M; DMSO:Water (5:100 v/v)) at 298 K.                                                                                 |
| 103. | Figure S92. | Synchronous fluorescence emission profile associated with titration of BSA (0.15 $\mu$ M; PBS, pH $\sim$ 7.4) with the addition of varying concentrations of <b>2</b> (0-16 $\mu$ M; PBS, pH $\sim$ 7.4) at the wavelength difference of $\Delta\lambda = 60$ nm.                            |
| 104. | Figure S93. | Synchronous fluorescence emission profile associated with titration of BSA (0.15 $\mu$ M; PBS, pH $\sim$ 7.4) with the addition of varying concentrations of <b>3</b> (0-16 $\mu$ M; PBS, pH $\sim$ 7.4) at the wavelength difference of $\Delta\lambda = 60$ nm.                            |
| 105. | Figure S94. | Synchronous fluorescence emission profile associated with titration of BSA (0.15 $\mu$ M; PBS, pH $\sim$ 7.4) with the addition of varying concentrations of Ru(p-cymene)dimer (0-16 $\mu$ M; PBS, pH $\sim$ 7.4) at the wavelength difference of $\Delta\lambda = 60$ nm.                   |
| 106. | Figure S95. | Synchronous fluorescence emission profile associated with titration of BSA (0.15 $\mu$ M; PBS, pH $\sim$ 7.4) with the addition of varying concentrations of <b>2</b> (0-16 $\mu$ M; PBS, pH $\sim$ 7.4) at the wavelength difference of $\Delta\lambda = 15$ nm.                            |
| 107. | Figure S96. | Synchronous fluorescence emission profile associated with titration of BSA (0.15 $\mu$ M; PBS, pH $\sim$ 7.4) with the addition of varying concentrations of <b>3</b> (0-16 $\mu$ M; PBS, pH $\sim$ 7.4) at the wavelength difference of $\Delta\lambda = 15$ nm.                            |
| 108. | Figure S97. | Synchronous fluorescence emission profile associated with titration of BSA (0.15 $\mu$ M; PBS, pH $\sim$ 7.4) with the addition of varying concentrations of Ru(p-cymene)dimer (0-16 $\mu$ M; PBS, pH $\sim$ 7.4) at the wavelength difference of $\Delta\lambda = 15$ nm.                   |
| 109. | Figure S98. | <i>In vitro</i> cytotoxicity of Ru precursor complex (a), <b>L<sub>1</sub></b> (b), <b>L<sub>2</sub></b> (c), <b>L<sub>3</sub></b> (d), complex <b>1</b> (e), complex <b>2</b> (f) and complex <b>3</b> (g) against MCF-7 cell lines measured by MTT assay after 48 h.                       |
| 110. | Figure S99. | <i>In vitro</i> calculated IC <sub>50</sub> values of Ru precursor complex (a), <b>L<sub>1</sub></b> (b), <b>L<sub>2</sub></b> (c), <b>L<sub>3</sub></b> (d), complex <b>1</b> (e), complex <b>2</b> (f) and complex <b>3</b> (g) against MCF-7 cell lines measured by MTT assay after 48 h. |

## CHNS REPORT

Method filename: C:\CHNS\Method\23-02-2018-test.mth  
 Method name: 23-02-2018-test  
 Printed: 03-01-2018 19:39  
 Elemental Analyser method:  
 Sampler method:  
 Sample ID: AS-TAK-35  
 Analysis type: Unknown  
 Chromatogram filename: C:\CHNS\Method\AS-TAK-35-23-02-18.DAT  
 Calibration method: K Factors  
 Sample weight: 1.012

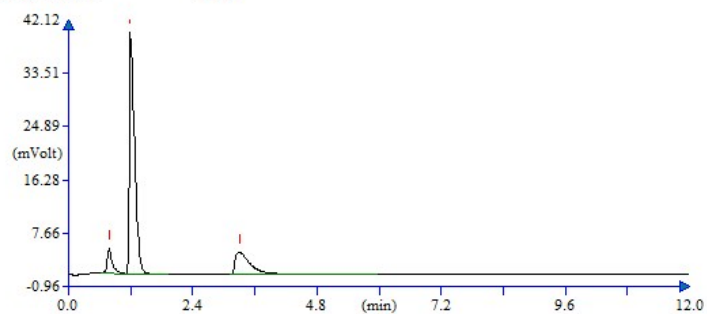

| Component Name | Retention Time<br>(min) | Area<br>(.1* $\mu$ V*sec) | Element % |
|----------------|-------------------------|---------------------------|-----------|
| Nitrogen       | 0.775                   | 279960                    | 7.252     |
| Carbon         | 1.192                   | 2717639                   | 54.521    |
| Hydrogen       | 3.300                   | 745545                    | 4.707     |
|                |                         | 3743143                   | 66.481    |

**Figure S1.** Data and graph obtained from elemental analysis of **1**.

## CHNS REPORT

Method filename: C:\CHNS\Method\23-02-2018-test.mth  
 Method name: 23-02-2018-test  
 Printed: 03-06-2018 19:24  
 Elemental Analyser method:  
 Sampler method:  
 Sample ID: AS-TAK-64  
 Analysis type: Unknown  
 Chromatogram filename: C:\CHNS\Method\AS-TAK-64-24-02-18.DAT  
 Calibration method: K Factors  
 Sample weight: 1.303

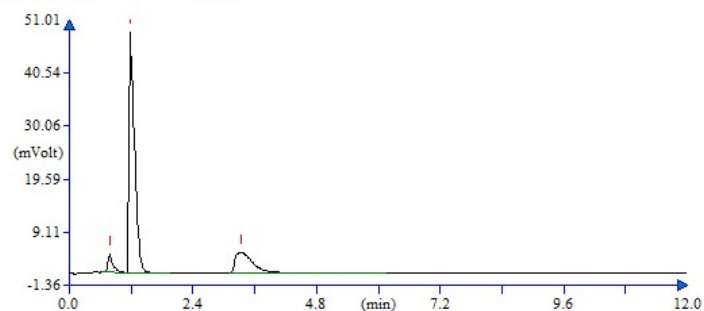

| Component Name | Retention Time<br>(min) | Area<br>(.1* $\mu$ V*sec) | Element % |
|----------------|-------------------------|---------------------------|-----------|
| Nitrogen       | 0.783                   | 250178                    | 4.263     |
| Carbon         | 1.175                   | 3440532                   | 53.609    |
| Hydrogen       | 3.325                   | 1008916                   | 4.959     |
|                |                         | 4699626                   | 62.830    |

**Figure S2.** Data and graph obtained from elemental analysis of **2**.



## CHNS REPORT

Method filename: C:\CHNS\Method\23-02-2018-test.mth  
 Method name: 23-02-2018-test  
 Printed: 03-06-2018 19:15  
 Elemental Analyser method:  
 Sampler method:  
 Sample ID: AS-TAK-57  
 Analysis type: UnkNown  
 Chromatogram filename: C:\CHNS\Method\AS-TAK-57-23-02-18.DAT  
 Calibration method: K Factors  
 Sample weight: 1.055

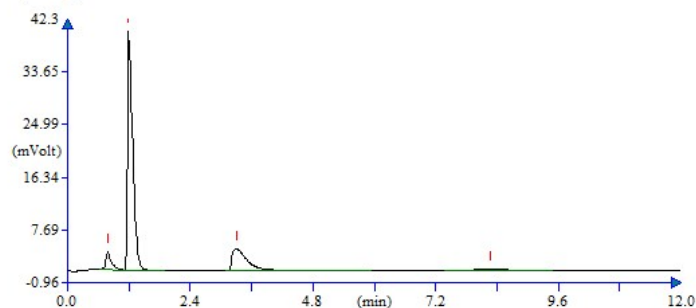

| Component Name | Retention Time (min) | Area (.1*uv*sec) | Element % |
|----------------|----------------------|------------------|-----------|
| Nitrogen       | 0.783                | 227697           | 3.903     |
| Carbon         | 1.192                | 2710206          | 52.156    |
| Hydrogen       | 3.300                | 760793           | 4.609     |
| Sulphur        | 8.258                | 109181           | 5.063     |
|                |                      | 3807877          | 65.730    |

Figure S3. Data and graph obtained from elemental analysis of **3**.

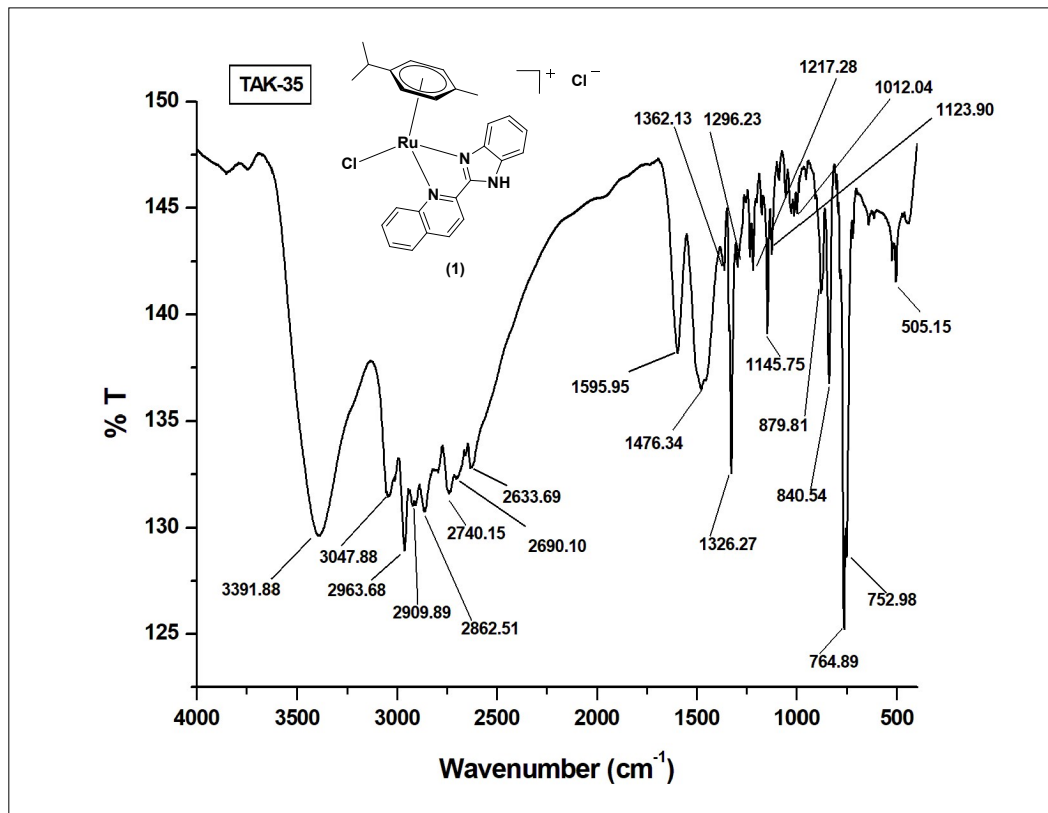

Figure S4. IR spectrum of **1** recorded using KBr disc technique.

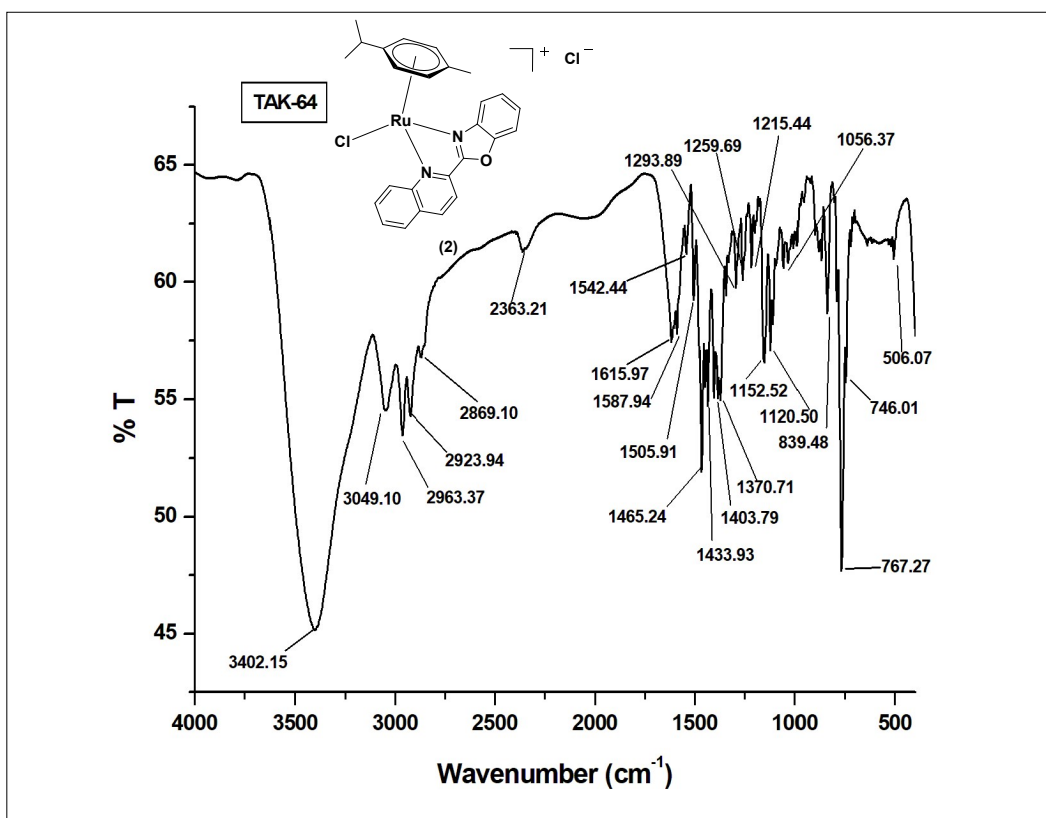

**Figure S5.** IR spectrum of **2** recorded using KBr disc technique.

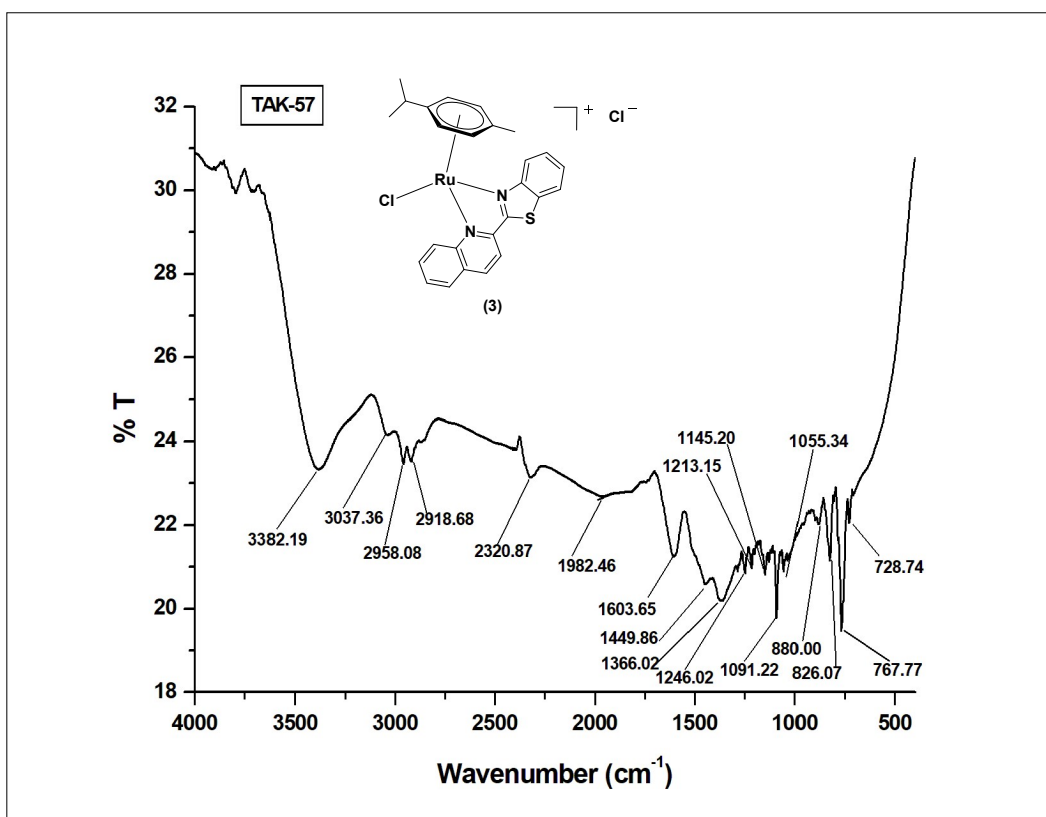

**Figure S6.** IR spectrum of **3** recorded using KBr disc technique.







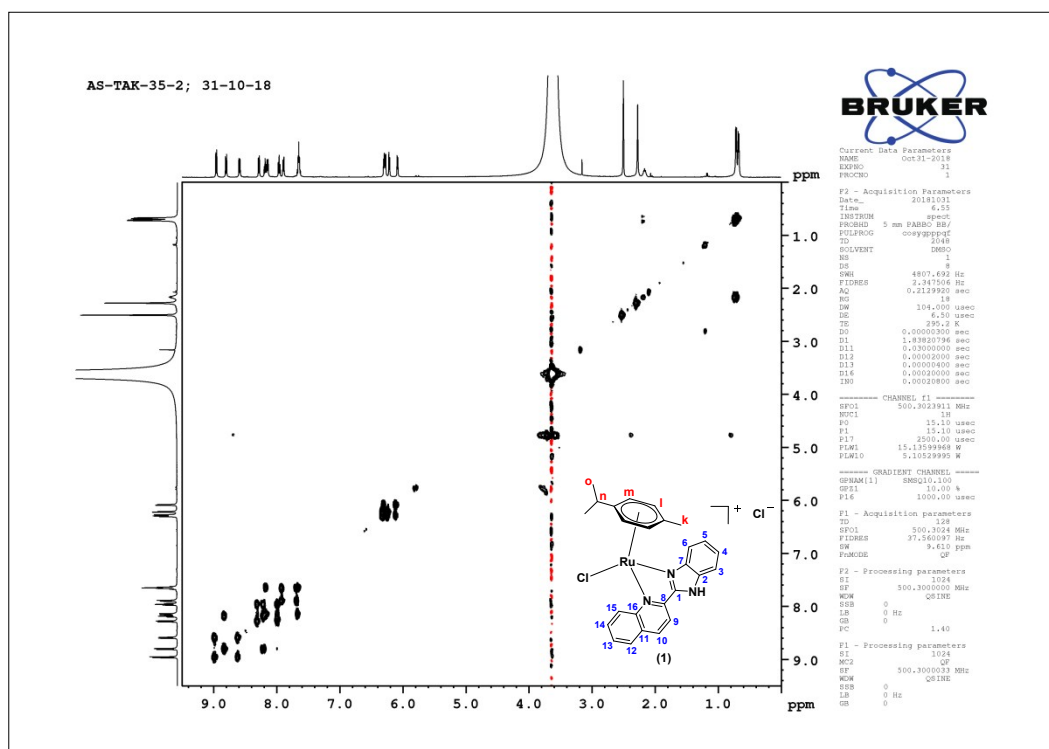

Figure S11.  $^1\text{H}$ - $^1\text{H}$ -COSY NMR spectrum of **1** recorded in  $\text{DMSO-d}_6$ .

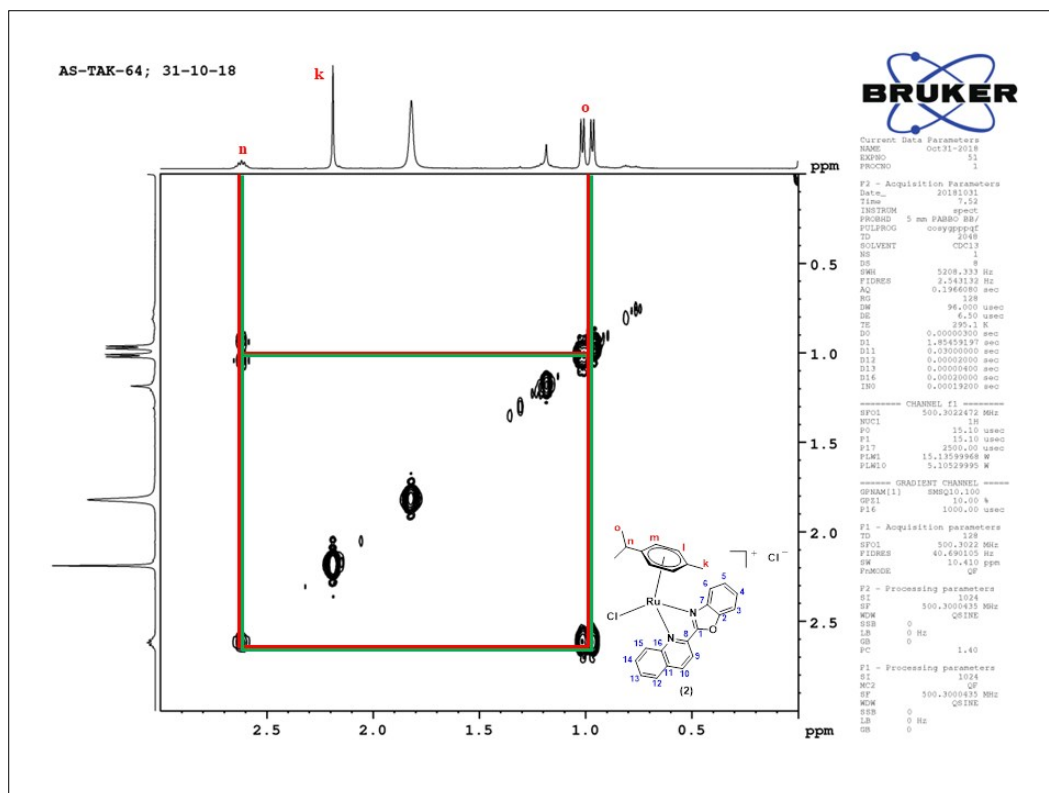

Figure S12. Aliphatic region of  $^1\text{H}$ - $^1\text{H}$ -COSY NMR spectrum of **2** recorded in  $\text{CDCl}_3$ .

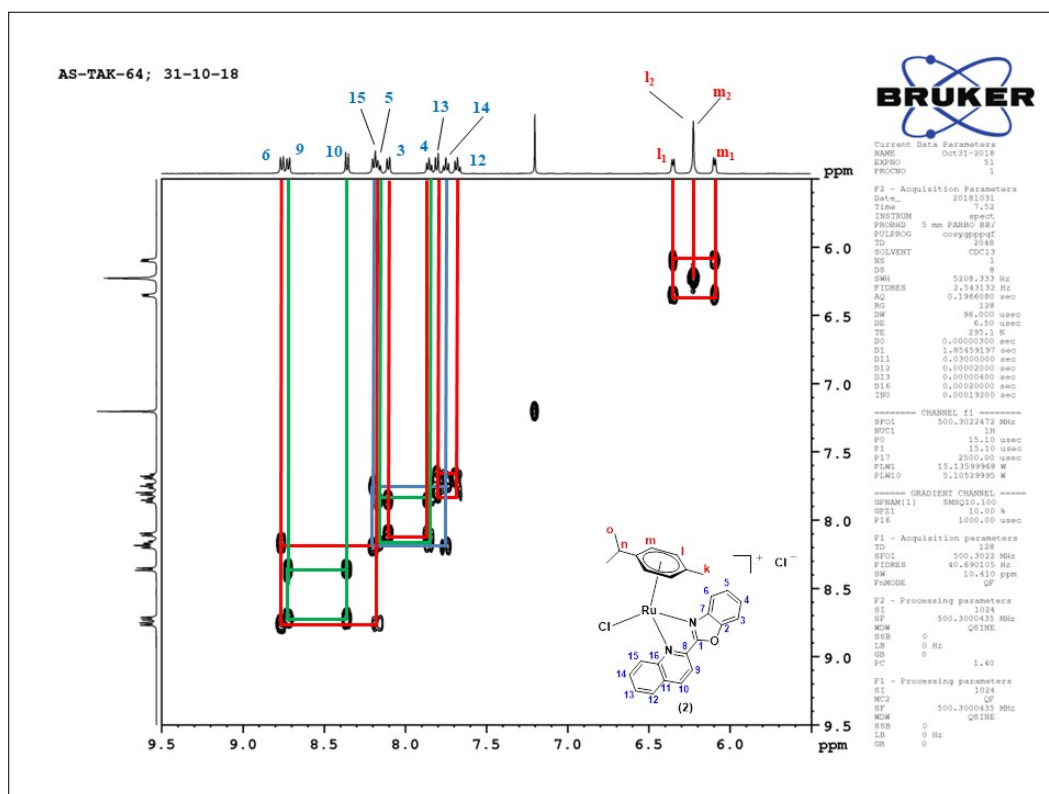

Figure S13. Aromatic region of  $^1\text{H}$ - $^1\text{H}$ -COSY NMR spectrum of **2** recorded in  $\text{CDCl}_3$ .

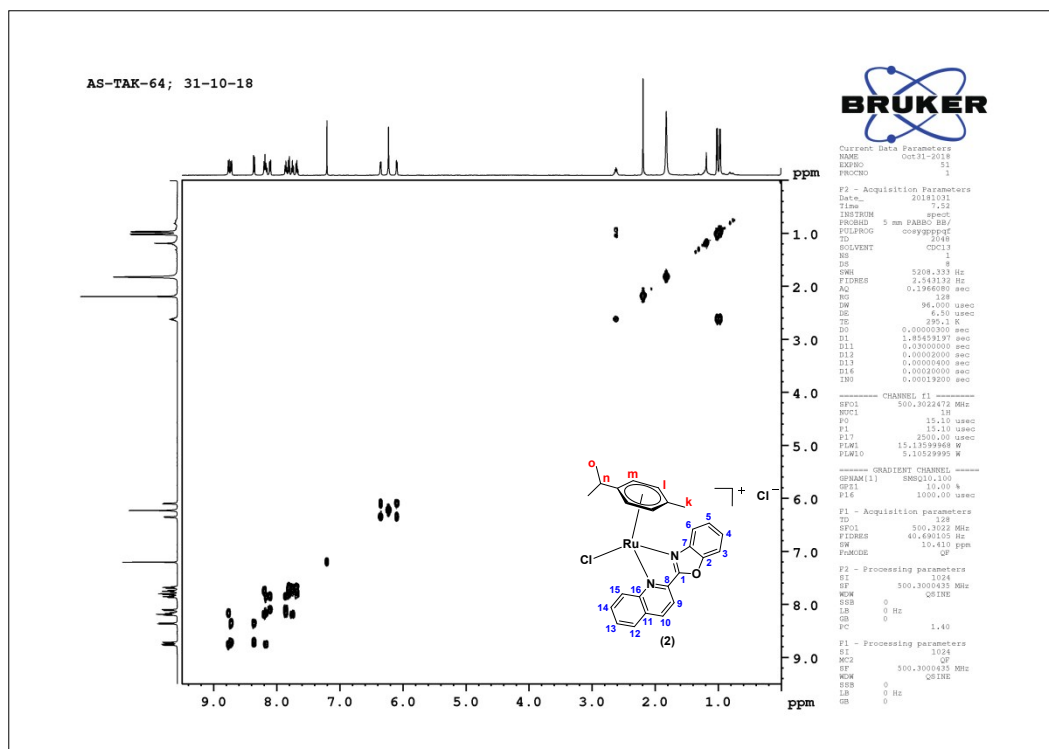

Figure S14.  $^1\text{H}$ - $^1\text{H}$ -COSY NMR spectrum of **2** recorded in  $\text{CDCl}_3$ .

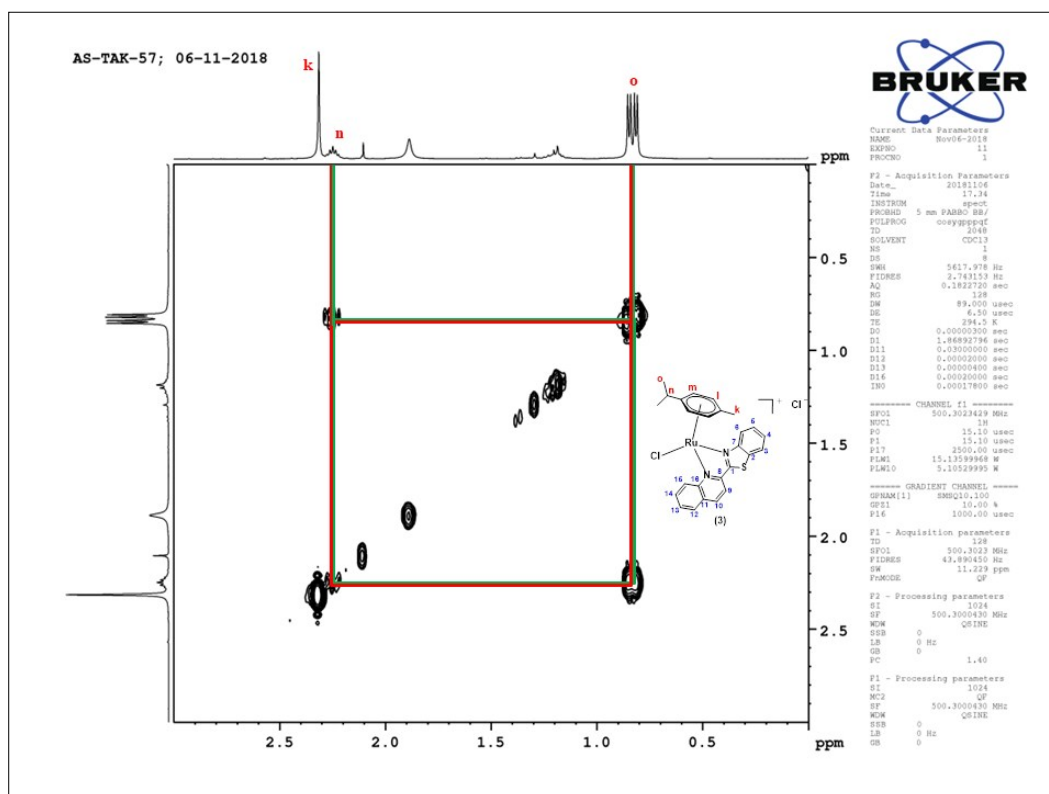

Figure S15. Aliphatic region of  $^1\text{H}$ - $^1\text{H}$ -COSY NMR spectrum of **3** recorded in  $\text{CDCl}_3$ .

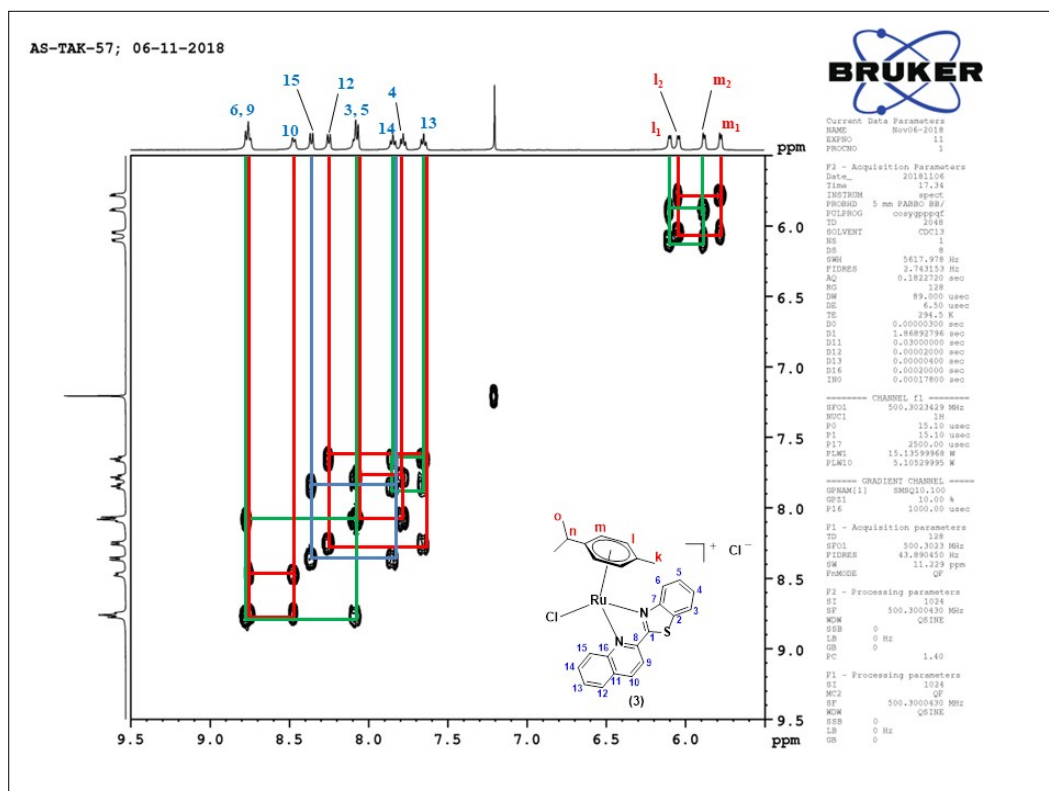

Figure S16. Aromatic region of  $^1\text{H}$ - $^1\text{H}$ -COSY NMR spectrum of **3** recorded in  $\text{CDCl}_3$ .

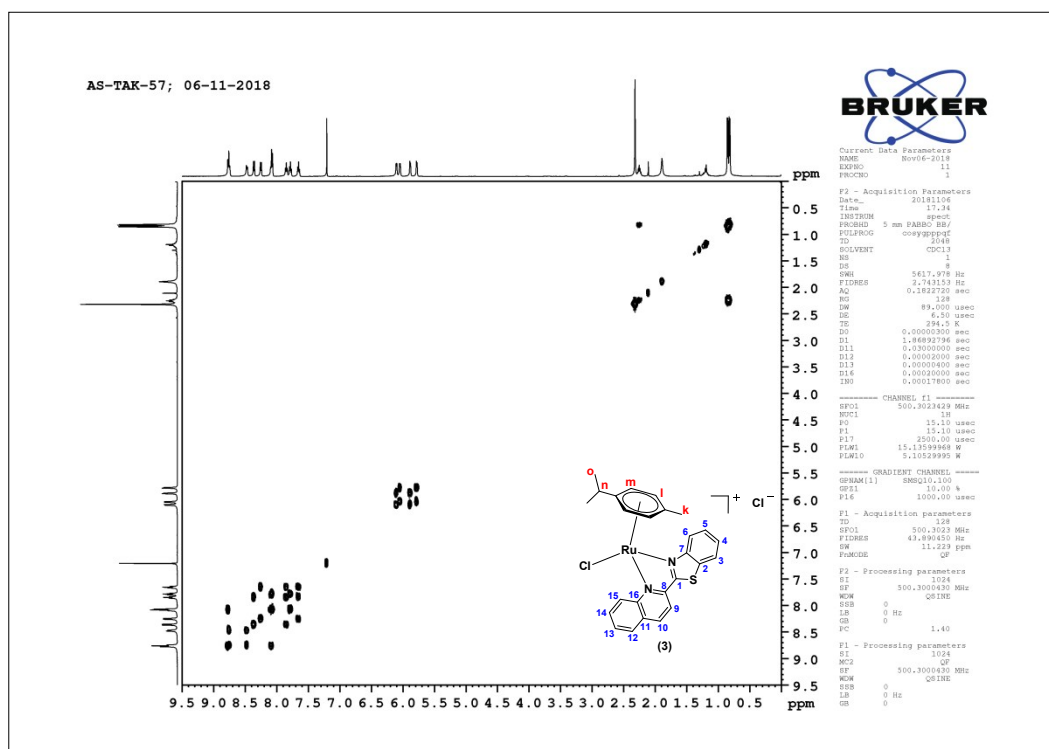

Figure S17.  $^1\text{H}$ - $^1\text{H}$ -COSY NMR spectrum of **3** recorded in  $\text{CDCl}_3$ .

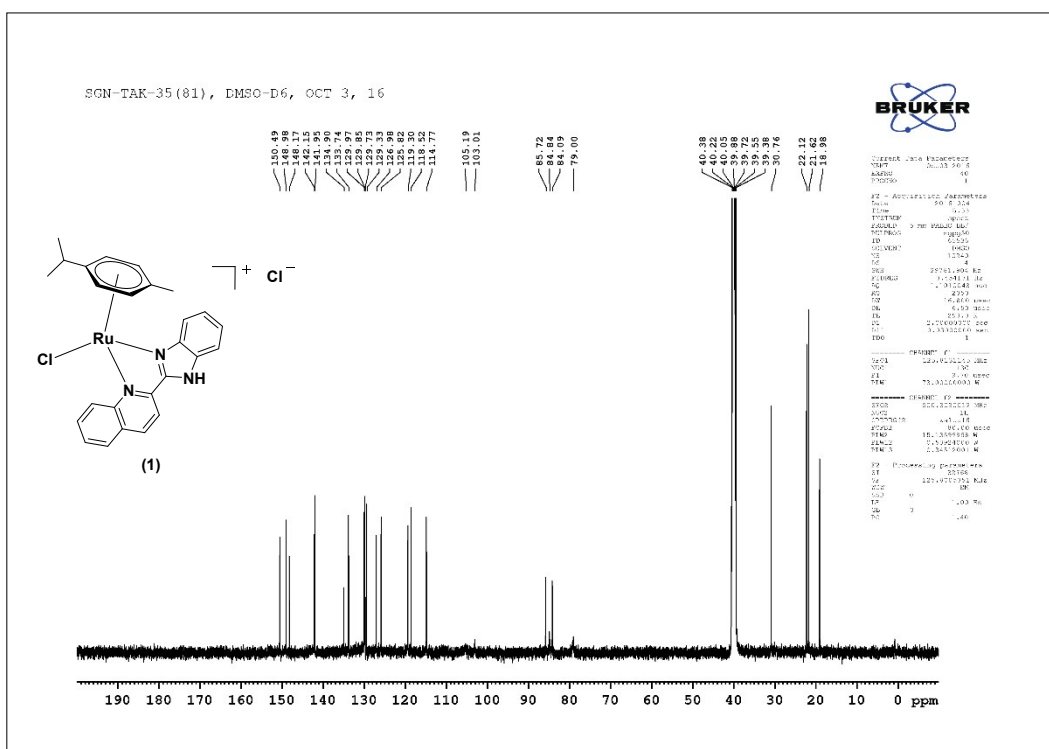

Figure S18.  $^{13}\text{C}$ -NMR spectrum of **1** recorded in  $\text{DMSO-d}_6$ .

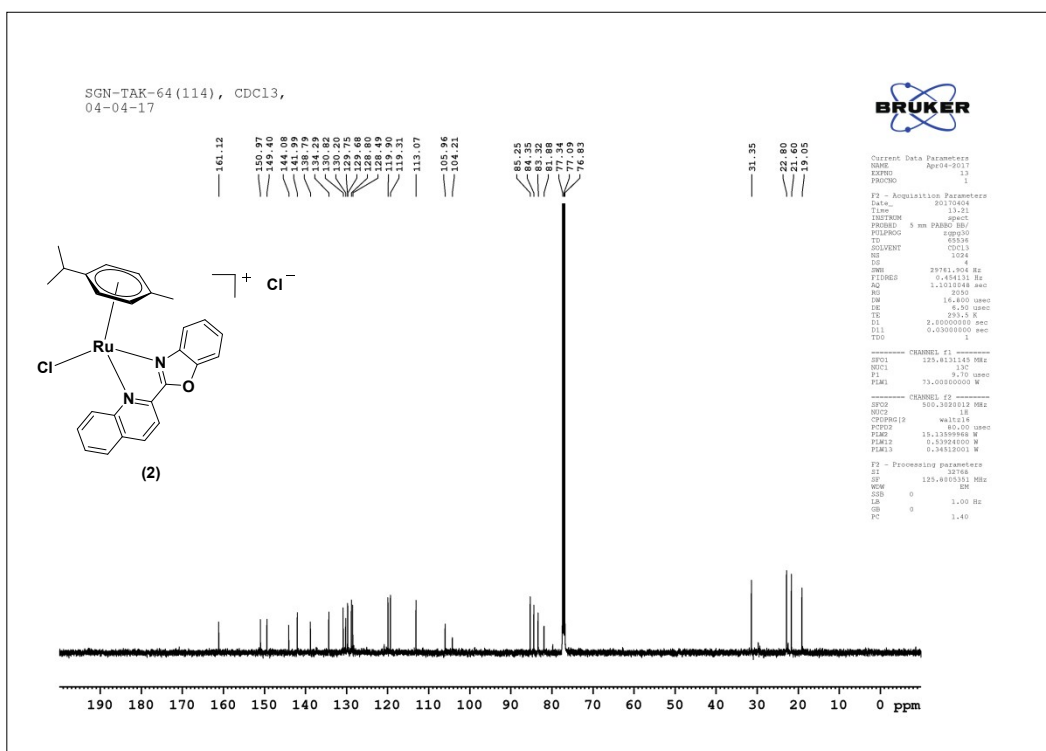

Figure S19. <sup>13</sup>C-NMR spectrum of **2** recorded in CDCl<sub>3</sub>.

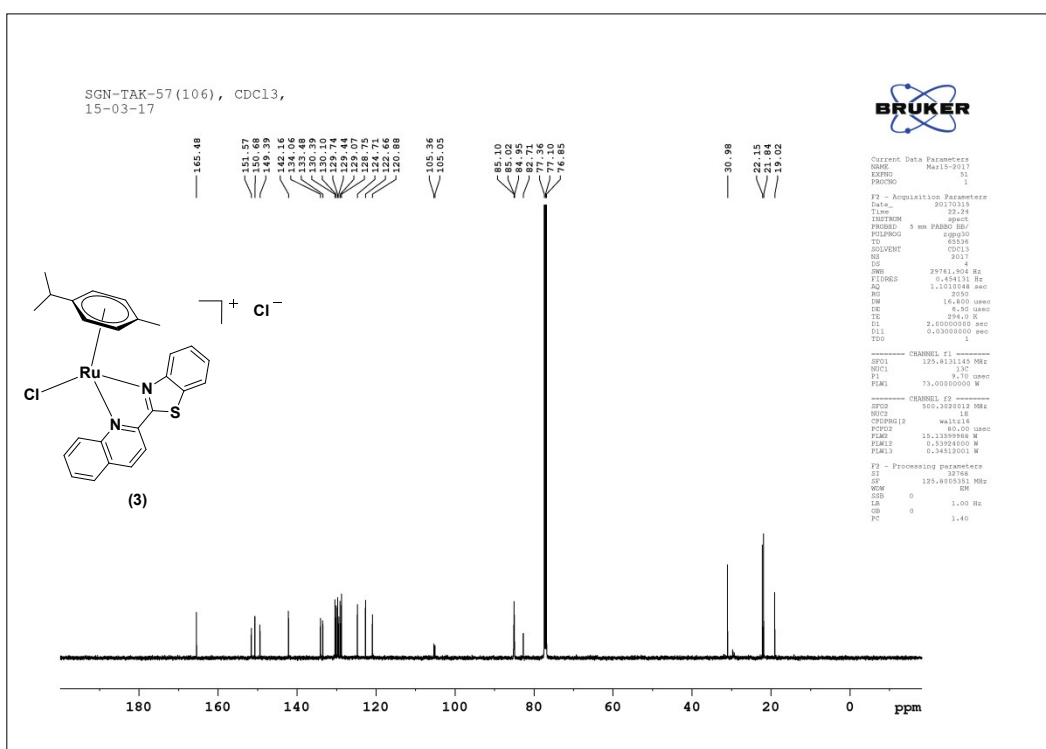

Figure S20. <sup>13</sup>C-NMR spectrum of **3** recorded in CDCl<sub>3</sub>.



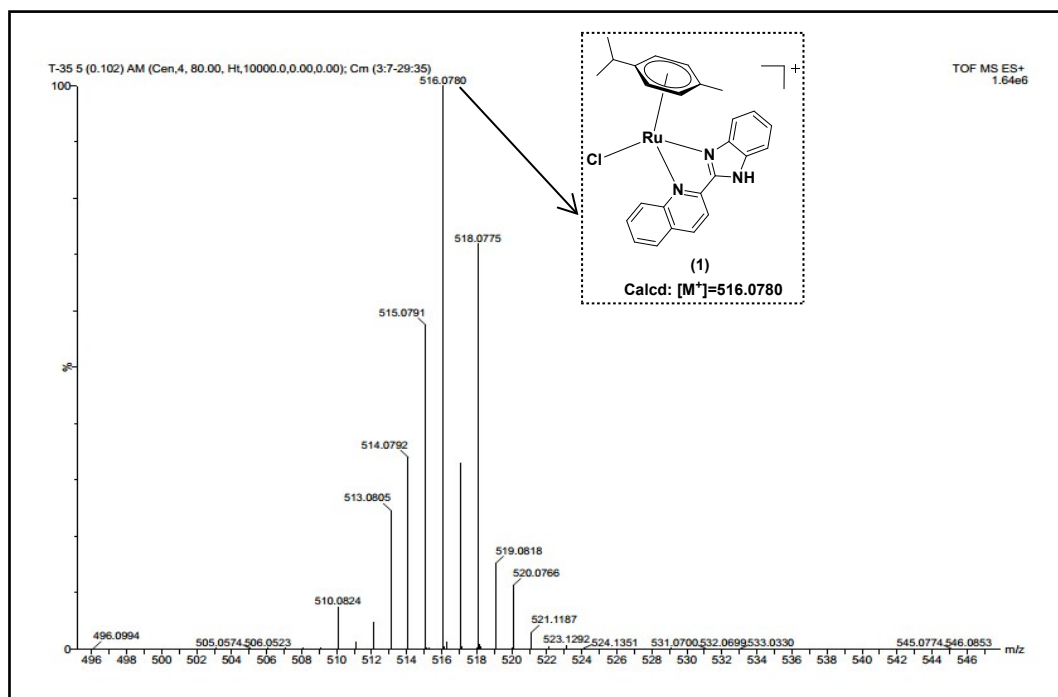

Figure S21. ESI-Mass spectrum of **1** recorded in methanol.

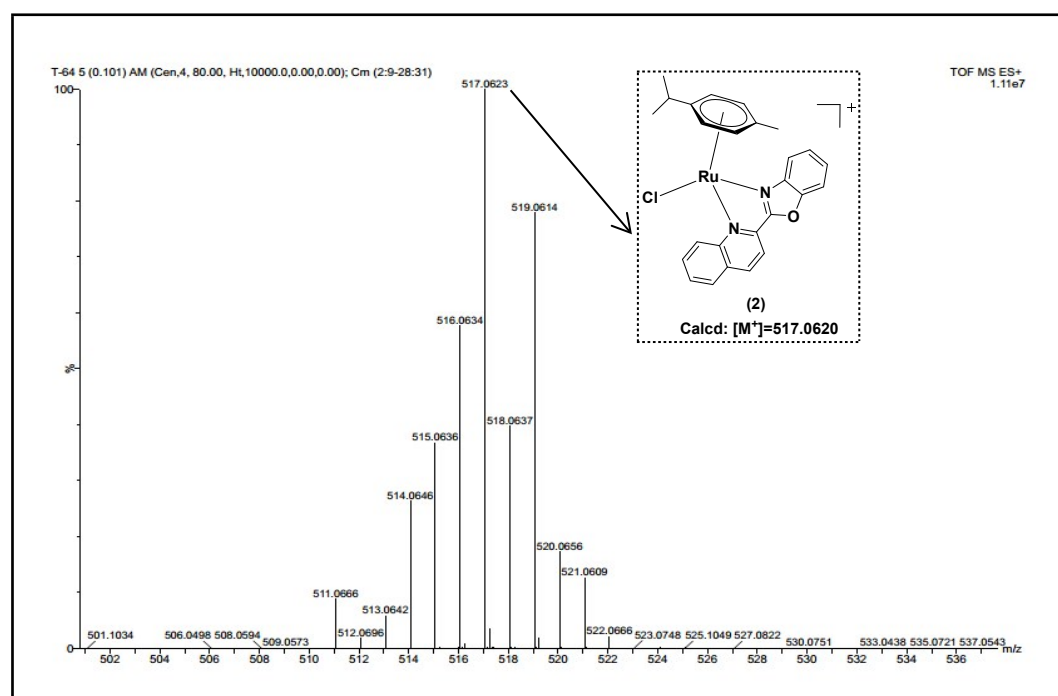

Figure S22. ESI-Mass spectrum of **2** recorded in methanol.

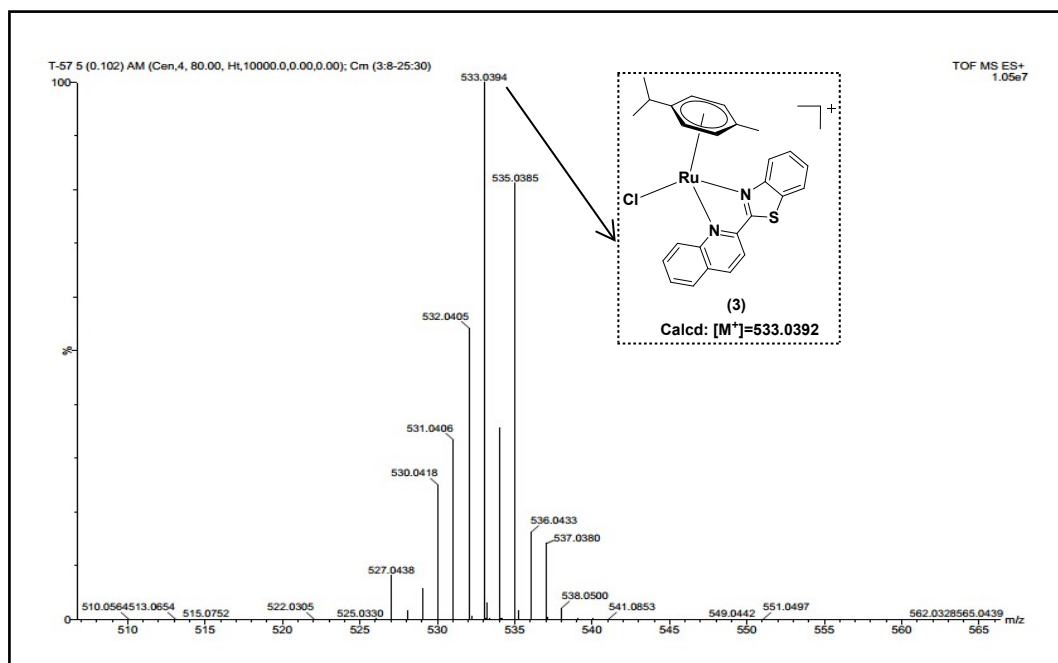

**Figure S23.** ESI-Mass spectrum of **3** recorded in methanol.

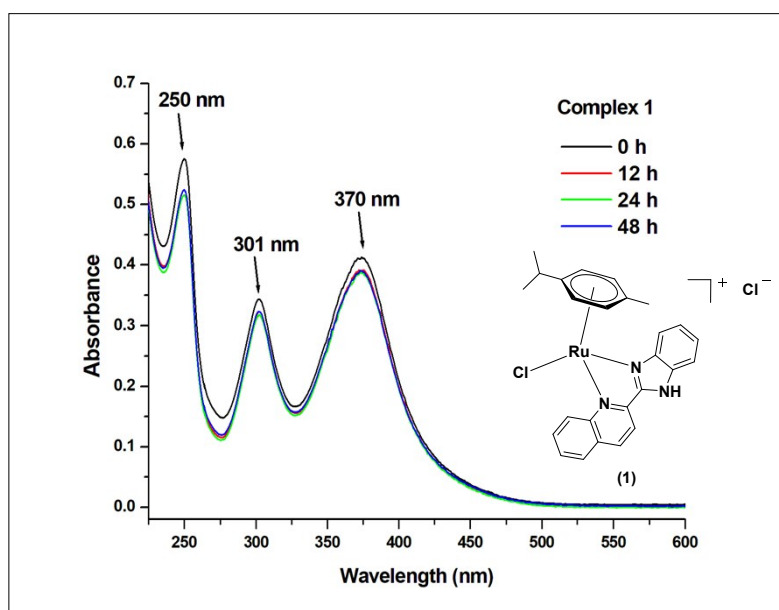

**Figure S24.** UV- Visible absorption spectra of **1** (26.66  $\mu$ M) recorded in PBS (pH = 7.4) after 0, 12, 24 and 48 h at 298 K.

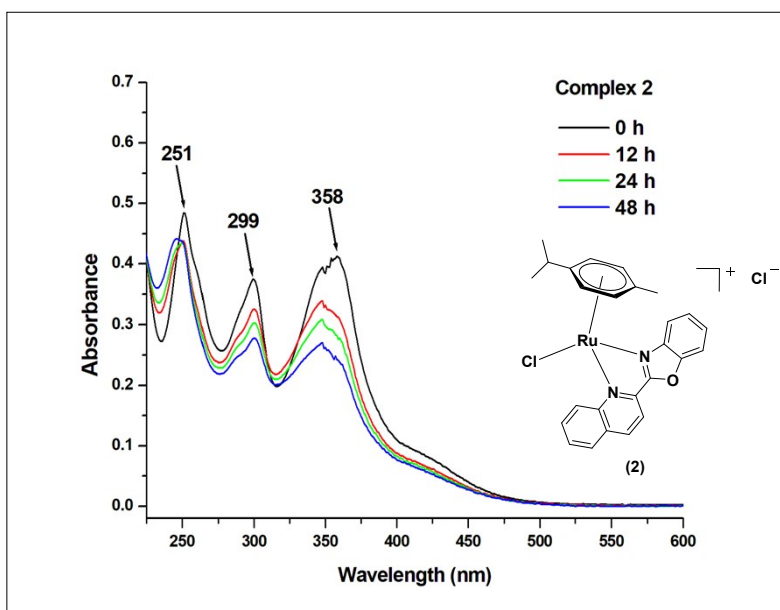

**Figure S25A.** UV-Visible absorption spectra of **2** (26.66  $\mu\text{M}$ ) recorded in PBS (pH = 7.4) after 0, 12, 24 and 48 h at 298 K.

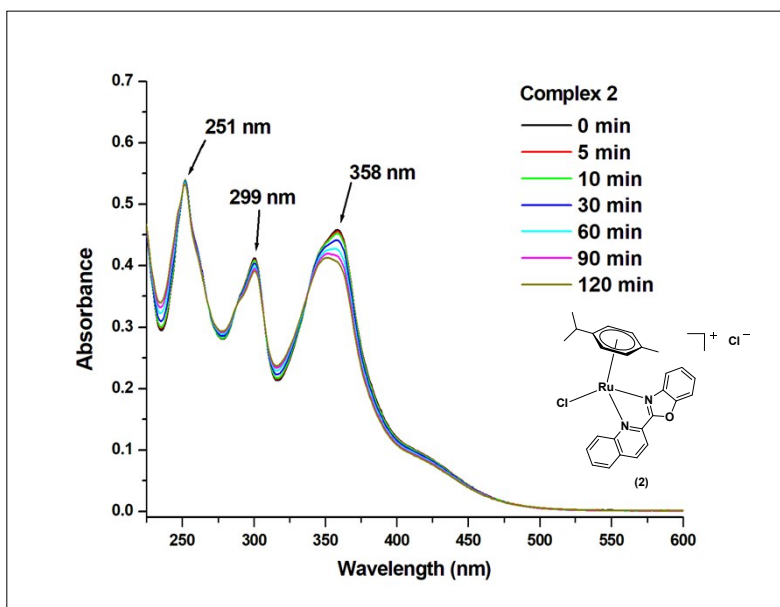

**Figure S25B.** UV-Visible absorption spectra of **2** (26.66  $\mu\text{M}$ ) recorded in PBS (pH = 7.4) after 0, 5, 10, 30, 60, 90 and 120 min at 298 K.

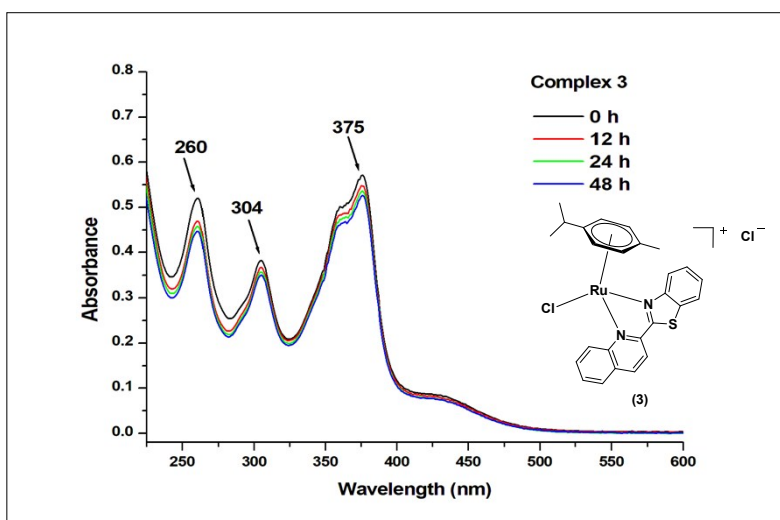

**Figure S26.** UV-Visible absorption spectra of **3** (26.66  $\mu\text{M}$ ) recorded in PBS (pH = 7.4) after 0, 12, 24 and 48 h at 298 K.

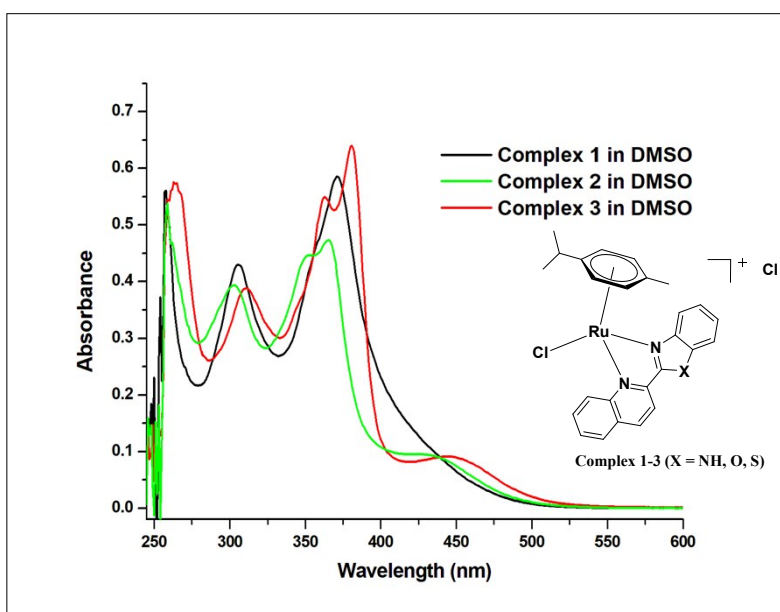

**Figure S27.** UV-Visible absorption spectra of **1**, **2** and **3** (26.66  $\mu\text{M}$ ) recorded in DMSO at 298 K.

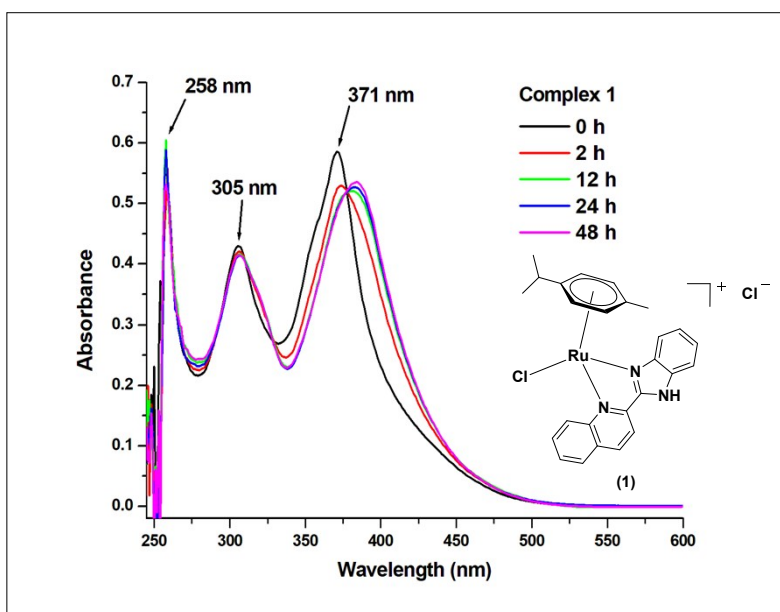

**Figure S28.** UV-Visible absorption spectra of **1** (26.66  $\mu\text{M}$ ) recorded in DMSO after 0, 2, 12, 24 and 48 h at 298 K.

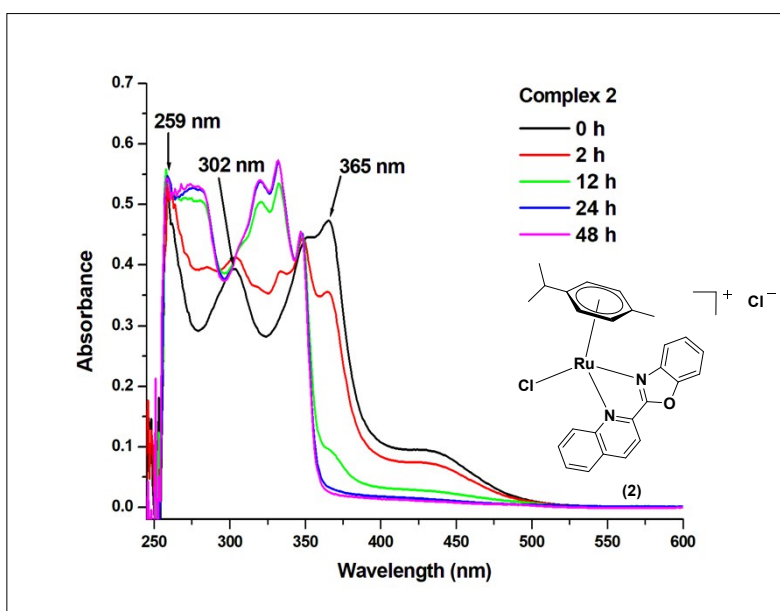

**Figure S29.** UV-Visible absorption spectra of **2** (26.66  $\mu\text{M}$ ) recorded in DMSO after 0, 2, 12, 24 and 48 h at 298 K.

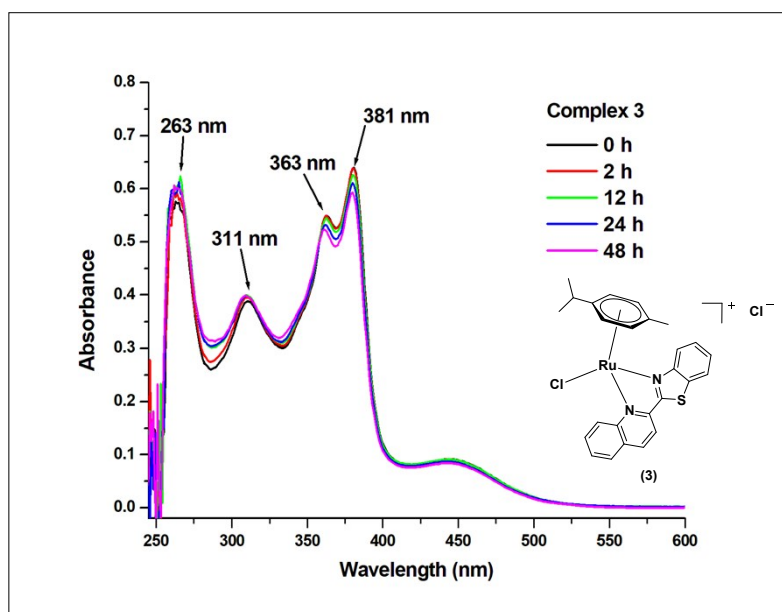

**Figure S30.** UV-Visible absorption spectra of **3** (26.66  $\mu\text{M}$ ) recorded in DMSO after 0, 2, 12, 24 and 48 h at 298 K.

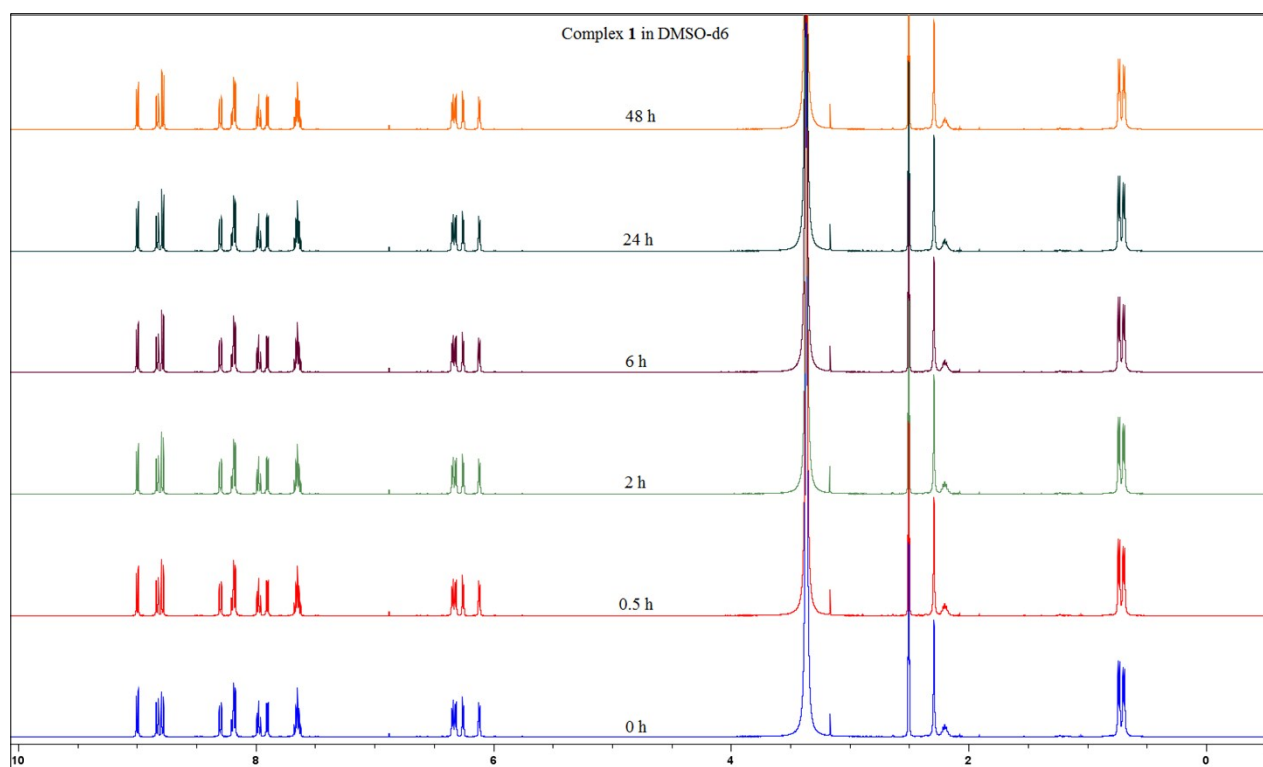

**Figure S31.**  $^1\text{H}$ -NMR spectrum of **1** recorded in  $\text{DMSO-d}_6$  after 0, 0.5, 2, 6, 24 and 48 h at 298 K.



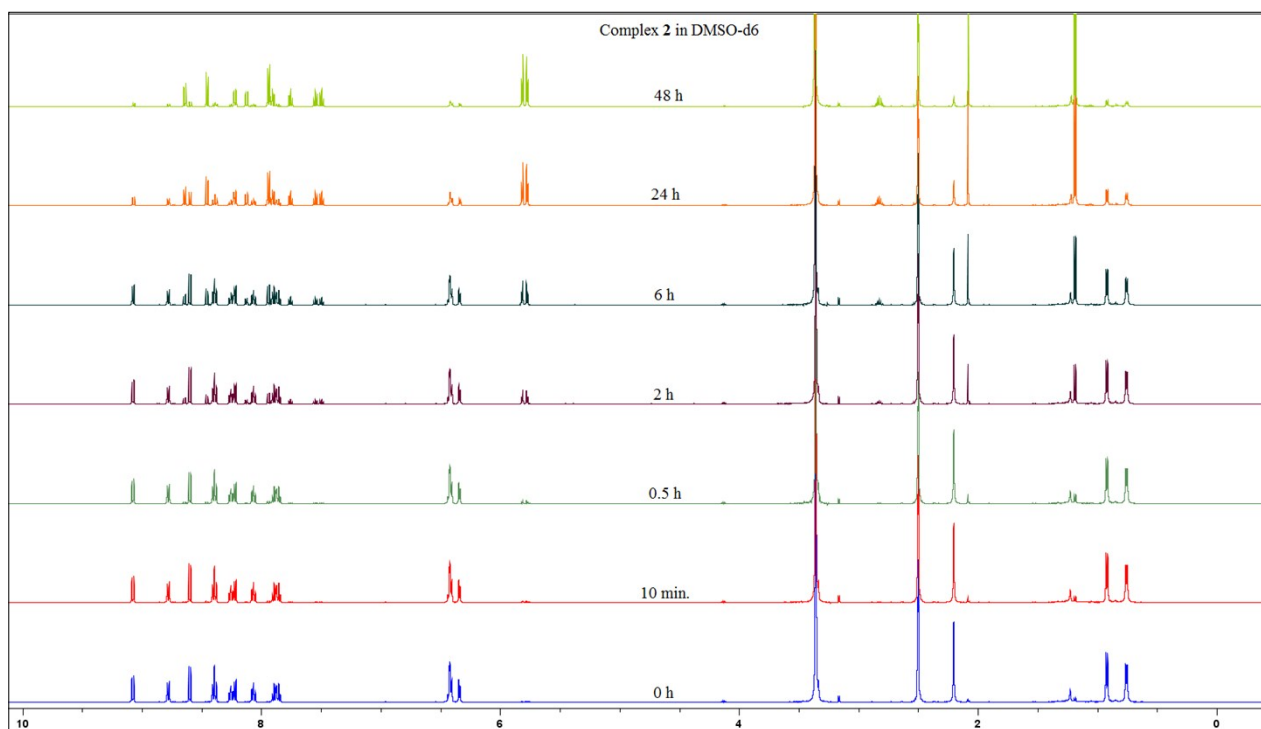

**Figure S32.**  $^1\text{H}$ -NMR spectrum of **2** recorded in  $\text{DMSO-d}_6$  after 0 h, 10 min., 0.5 h, 2 h, 6 h, 24 h and 48 h at 298 K.

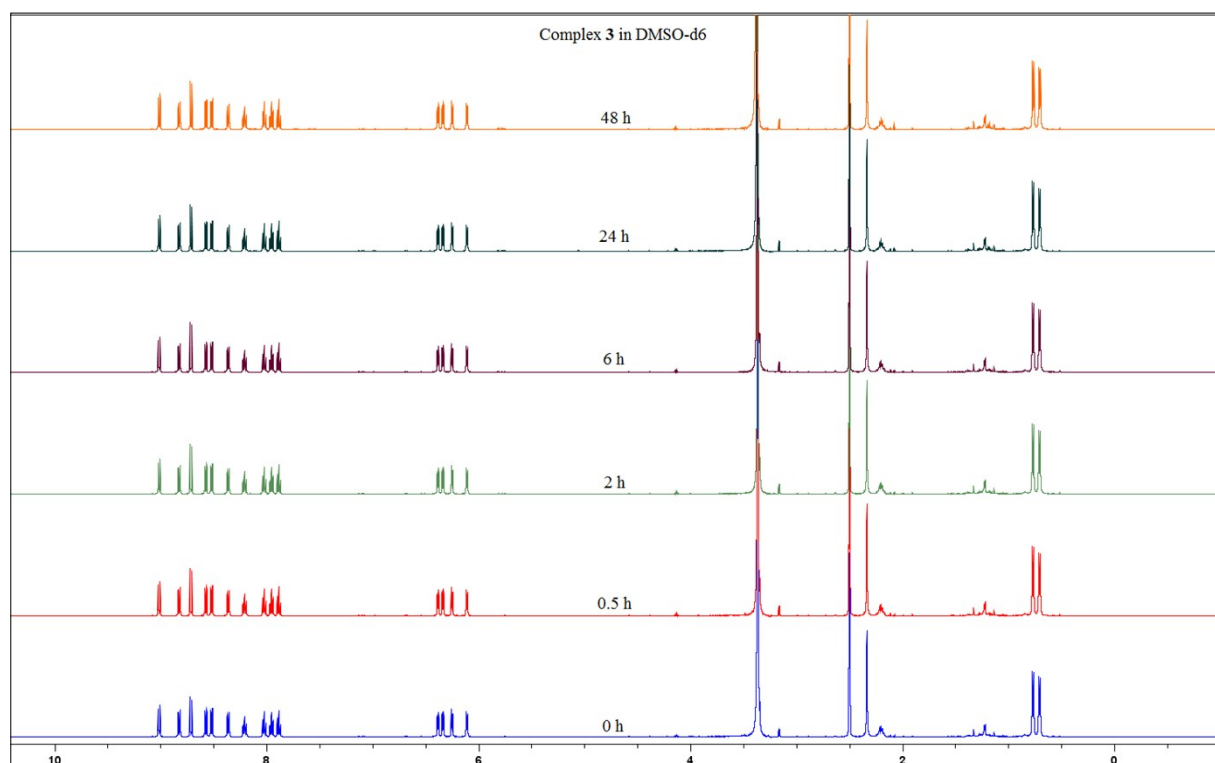

**Figure S33.**  $^1\text{H}$ -NMR spectrum of **3** recorded in  $\text{DMSO-d}_6$  after 0, 0.5, 2, 6, 24 and 48 h at 298 K.

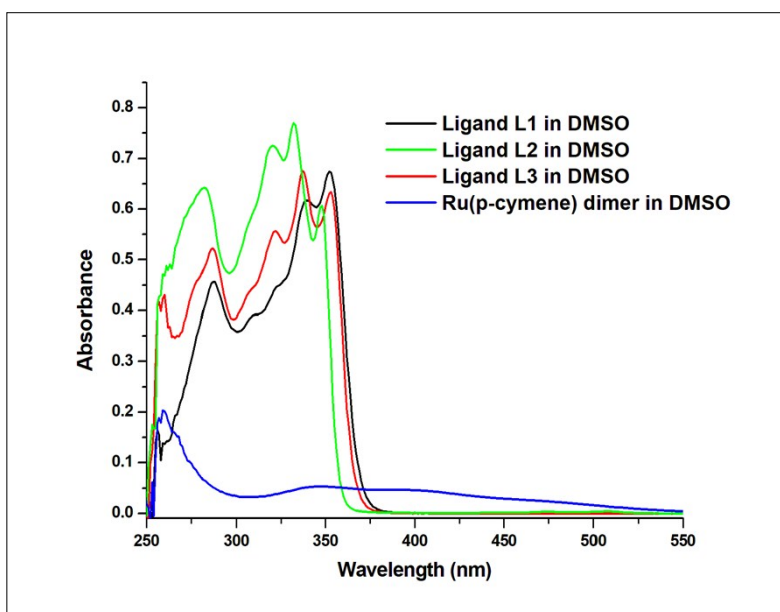

**Figure S34.** UV-Visible absorption spectra of **L<sub>1</sub>**, **L<sub>2</sub>**, **L<sub>3</sub>** and Ru(p-cymene)dimer (26.66  $\mu$ M) recorded in DMSO at 298 K.

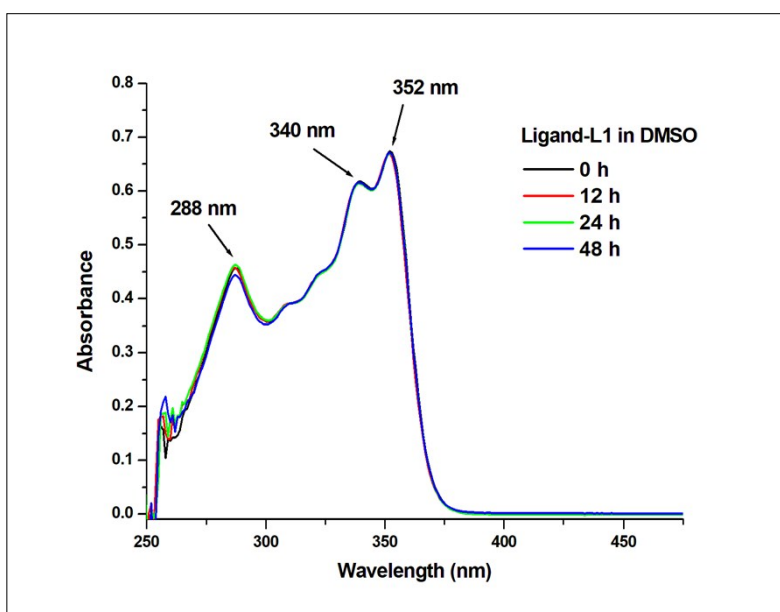

**Figure S35.** UV-Visible absorption spectra of **L<sub>1</sub>** (26.66  $\mu$ M) recorded in DMSO after 0, 12, 24 and 48 h at 298 K.

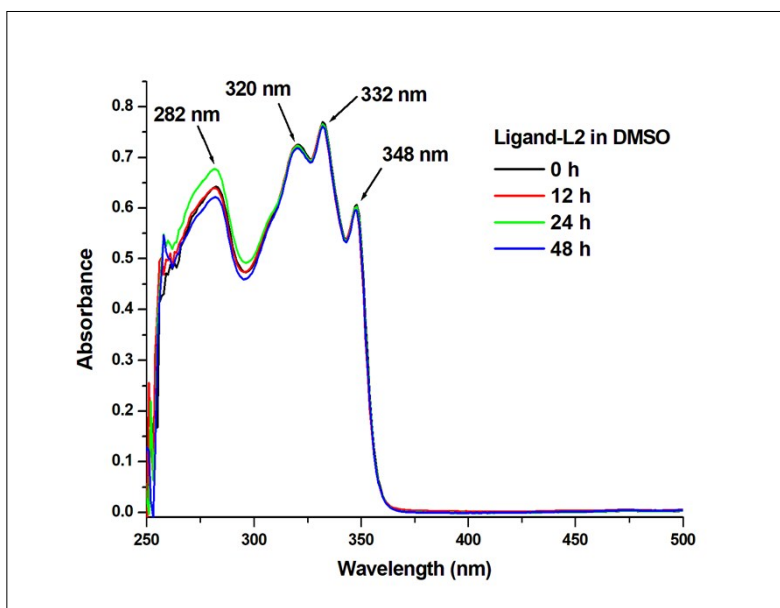

**Figure S36.** UV-Visible absorption spectra of  $L_2$  (26.66  $\mu\text{M}$ ) recorded in DMSO after 0, 12, 24 and 48 h at 298 K.

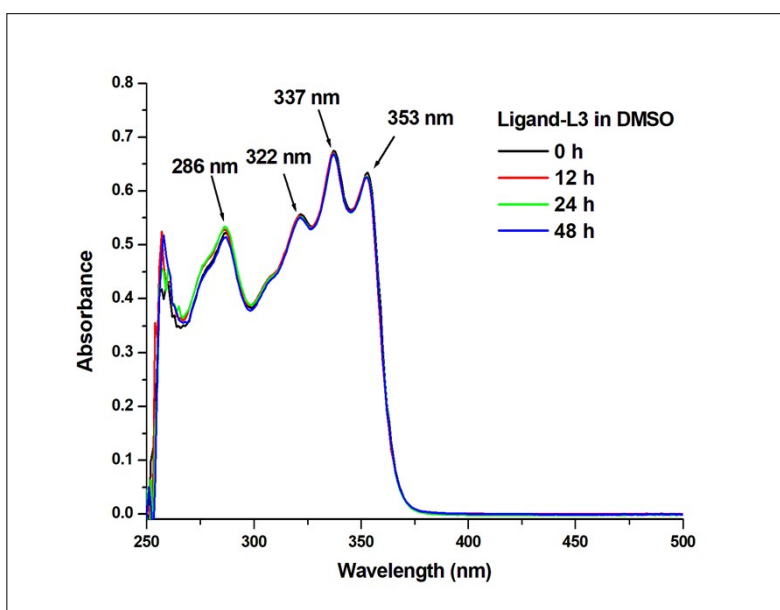

**Figure S37.** UV-Visible absorption spectra of  $L_3$  (26.66  $\mu\text{M}$ ) recorded in DMSO after 0, 12, 24 and 48 h at 298 K.

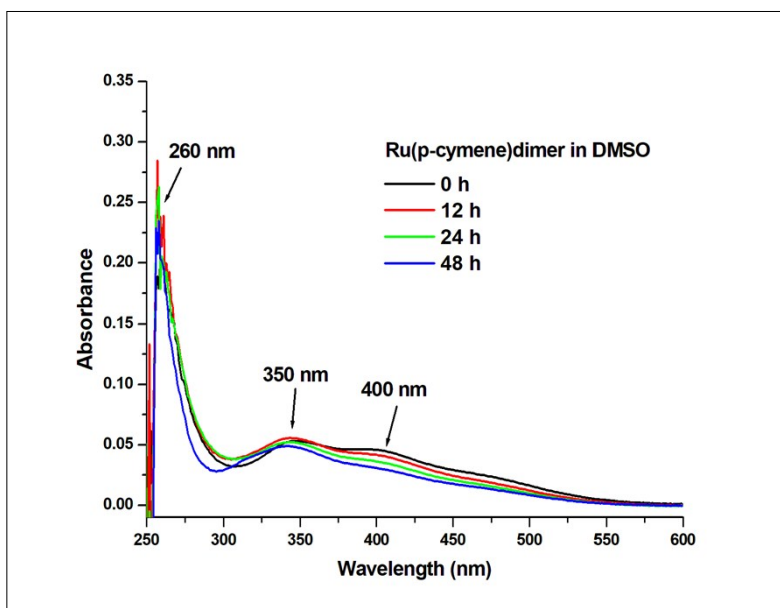

**Figure S38.** UV-Visible absorption spectra of Ru(p-cymene)dimer (26.66  $\mu\text{M}$ ) recorded in DMSO after 0, 12, 24 and 48 h at 298 K.

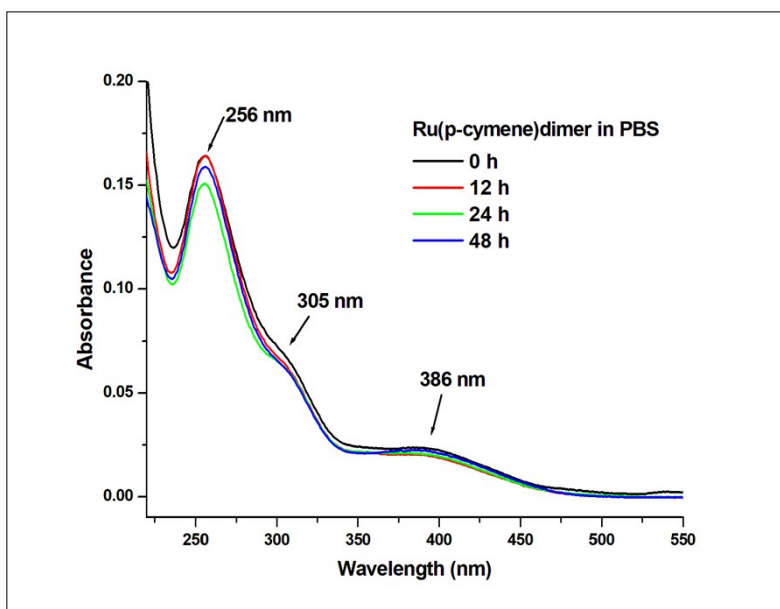

**Figure S39.** UV-Visible absorption spectra of Ru(p-cymene)dimer (26.66  $\mu\text{M}$ ) recorded in PBS (pH = 7.4) after 0, 12, 24 and 48 h at 298 K.

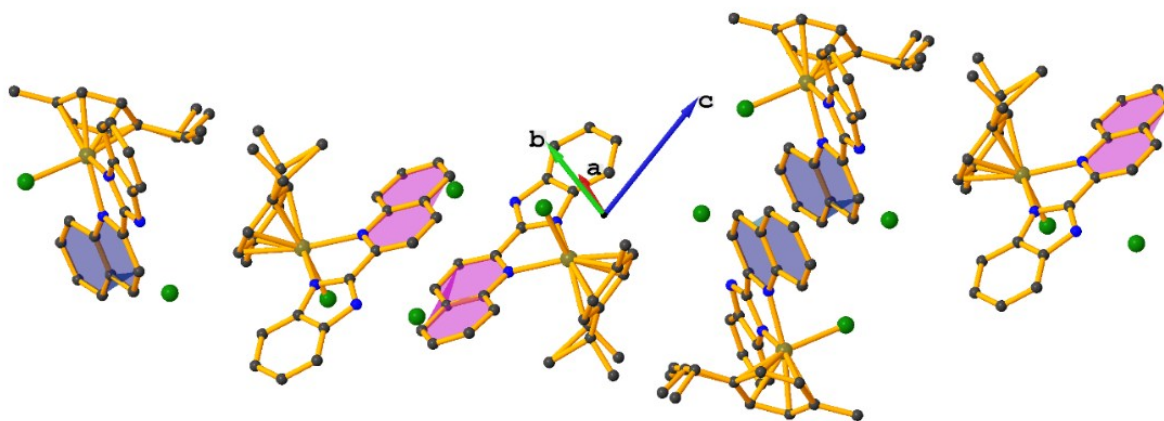

**Figure S40.** Demonstrating intermolecular  $\pi$ - $\pi$  stacking interactions for **1**; [Hydrogen atoms and solvent molecules omitted for clarity].

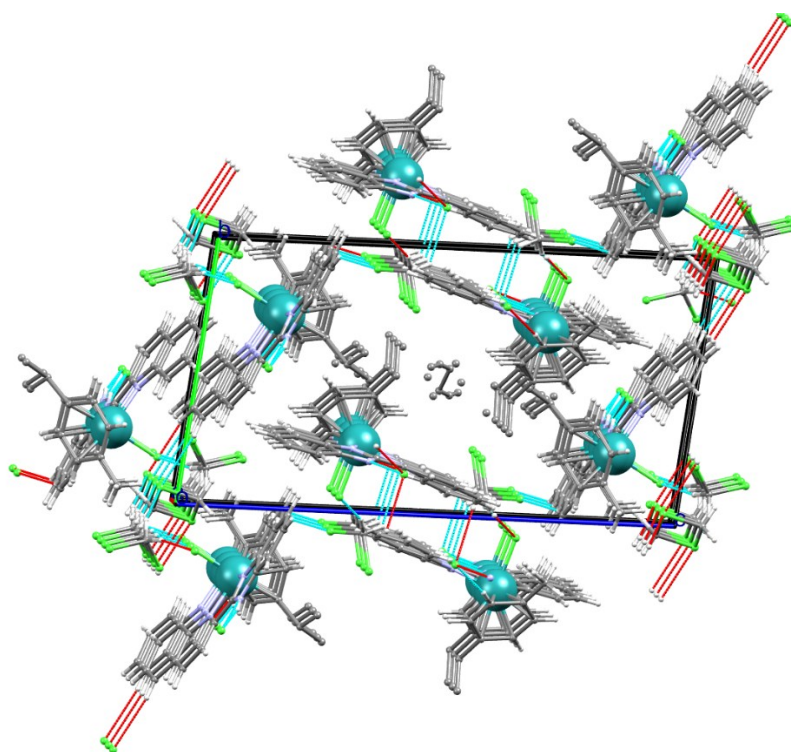

**Figure S41.** Showing C-H $\cdots$ Cl and N-H $\cdots$ Cl hydrogen bonded network in crystal structure of **1**.

**Table S1.** Selected bond distances and bond angles ( $\text{\AA}$ ,  $^\circ$ ) observed in crystal structure of **1**.

| Molecule 1 | Bond Distance | Molecule 2 | Bond Distance |
|------------|---------------|------------|---------------|
| Ru1-N1     | 2.171(5)      | Ru2-N4     | 2.170(5)      |
| Ru1-N2     | 2.072(5)      | Ru2-N5     | 2.075(5)      |
| Ru1-C1     | 2.250(7)      | Ru2-C27    | 2.235(7)      |
| Ru1-C2     | 2.191(6)      | Ru2-C28    | 2.198(7)      |
| Ru1-C3     | 2.167(7)      | Ru2-C29    | 2.175(7)      |
| Ru1-C4     | 2.182(8)      | Ru2-C30    | 2.201(9)      |
| Ru1-C5     | 2.169(8)      | Ru2-C31    | 2.170(8)      |

|                   |                   |                   |                   |
|-------------------|-------------------|-------------------|-------------------|
| Ru1-C6            | 2.223(8)          | Ru2-C32           | 2.227(7)          |
| Ru1-Cl1           | 2.3901(16)        | Ru2-Cl2           | 2.3966(18)        |
| <b>Molecule 1</b> | <b>Bond Angle</b> | <b>Molecule 2</b> | <b>Bond Angle</b> |
| N2-Ru1-N1         | 75.88(19)         | N5-Ru2-N4         | 76.07(19)         |
| N1-Ru1-Cl1        | 85.33(13)         | N4-Ru2-Cl2        | 86.20(13)         |
| N2-Ru1-Cl1        | 86.87(15)         | N5-Ru2-Cl2        | 86.36(14)         |

**Table S2.**  $\pi \cdots \pi$  interaction parameters ( $\text{\AA}$ ,  $^\circ$ ) associated with crystal structure of **1**.

| Cg $\cdots$ Cg       | Cg $\cdots$ Cg | Dihedral angle | Slippage | Symmetry    |
|----------------------|----------------|----------------|----------|-------------|
| Cg(2) $\cdots$ Cg(2) | 3.690(4)       | 0.0(3)         | 1.409    | 2-x,2-y,1-z |
| Cg(2) $\cdots$ Cg(4) | 3.779(4)       | 4.5(3)         | 1.816    | 2-x,2-y,1-z |
| Cg(7) $\cdots$ Cg(7) | 3.762(4)       | 0.0(3)         | 1.746    | 1-x,1-y,2-z |
| Cg(7) $\cdots$ Cg(9) | 3.632(4)       | 5.4(3)         | 1.686    | 1-x,1-y,2-z |

Cg(2): N4-C37-C38-C39-C40-C45; Cg(4): C40-C41-C42-C43-C44-C45; Cg(7): N1-C11-C12-C13-C14-C19; Cg(9): C14-C15-C16-C17-C18-C19

**Table S3.** Hydrogen bond parameters ( $\text{\AA}$ ,  $^\circ$ ) associated with crystal structure of **1**.

| X-H $\cdots$ Y        | X-H      | H $\cdots$ Y | X $\cdots$ Y | X-H $\cdots$ Y | Symmetry    |
|-----------------------|----------|--------------|--------------|----------------|-------------|
| N3-H3S $\cdots$ Cl3   | 0.78(10) | 2.21(10)     | 2.967(6)     | 165(8)         |             |
| C15-H15 $\cdots$ Cl9  | 0.9300   | 2.8300       | 3.555(7)     | 136.00         | 1-x,1-y,2-z |
| C24-H24 $\cdots$ Cl7  | 0.9300   | 2.7600       | 3.523(9)     | 140.00         | x,-1+y,z    |
| C32-H32 $\cdots$ Cl4  | 0.9300   | 2.6500       | 3.575(11)    | 173.00         | -1+x,y,z    |
| C33-H33C $\cdots$ Cl2 | 0.9600   | 2.7800       | 3.353(11)    | 119.00         |             |
| C53-H53A $\cdots$ Cl2 | 0.9700   | 2.6900       | 3.619(9)     | 160.00         | 1+x,y,z     |
| C53-H53B $\cdots$ Cl4 | 0.9700   | 2.8000       | 3.531(9)     | 133.00         |             |
| C54-H54A $\cdots$ Cl1 | 0.9700   | 2.7200       | 3.668(10)    | 166.00         | 1-x,1-y,2-z |

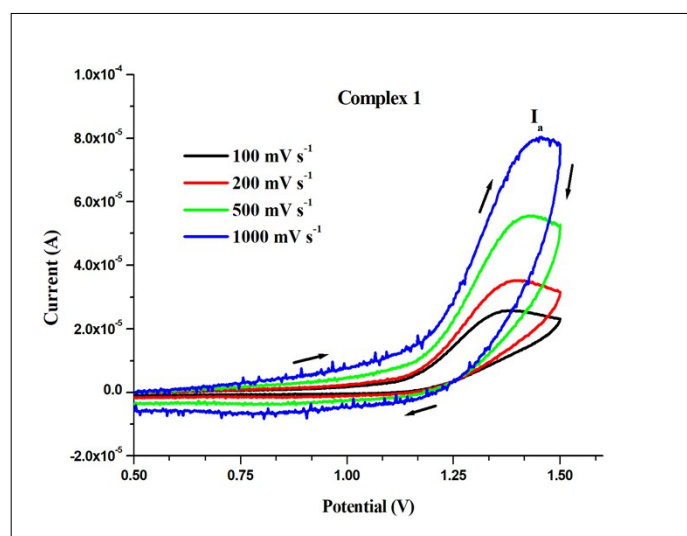

**Figure S42.** Cyclic voltammograms of **1** (1 mM) solution in  $\text{CH}_3\text{CN}$  with 0.1 M  $[\text{nBu}_4\text{N}][\text{ClO}_4]$  at scan rates: 100  $\text{mV s}^{-1}$ , 200  $\text{mV s}^{-1}$ , 500  $\text{mV s}^{-1}$ , 1000  $\text{mV s}^{-1}$  at room temperature (Range: 0.5 to 1.5 V).



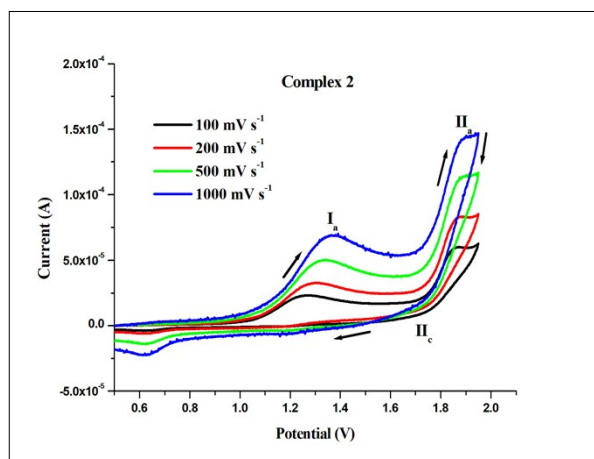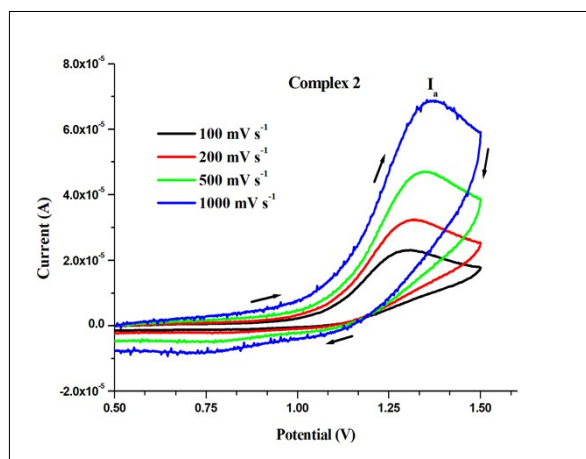

**Figure S43.** Cyclic voltammograms of **2** (1 mM) solution in  $\text{CH}_3\text{CN}$  with 0.1 M  $[\text{nBu}_4\text{N}][\text{ClO}_4]$  at scan rates: 100  $\text{mV s}^{-1}$ , 200  $\text{mV s}^{-1}$ , 500  $\text{mV s}^{-1}$ , 1000  $\text{mV s}^{-1}$  at room temperature (Range: 0.5 to 1.95 V and 0.5 to 1.5 V).

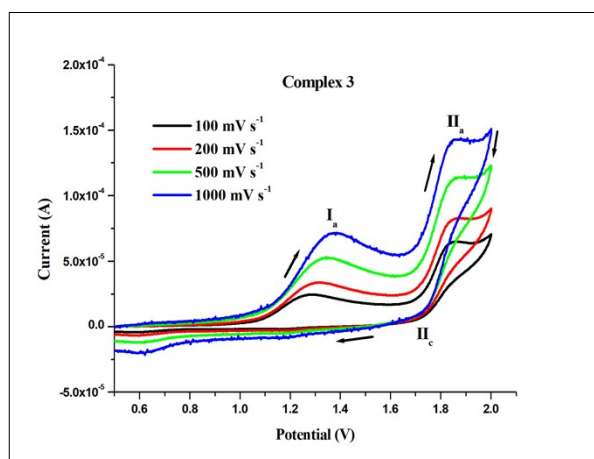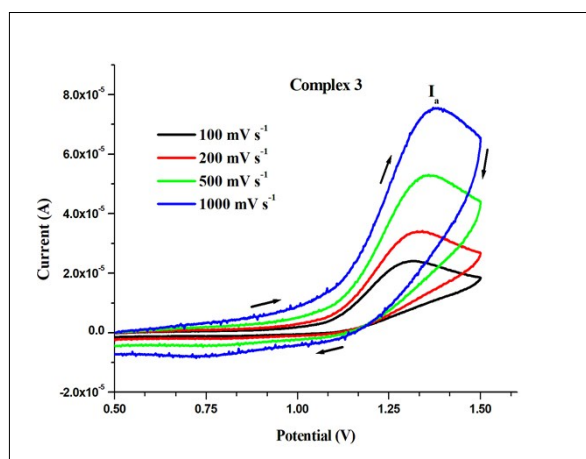

**Figure S44.** Cyclic voltammograms of **3** (1 mM) solution in  $\text{CH}_3\text{CN}$  with 0.1 M  $[\text{nBu}_4\text{N}][\text{ClO}_4]$  at scan rates: 100  $\text{mV s}^{-1}$ , 200  $\text{mV s}^{-1}$ , 500  $\text{mV s}^{-1}$ , 1000  $\text{mV s}^{-1}$  at room temperature (Range: 0.5 to 2.0 V and 0.5 to 1.5 V).

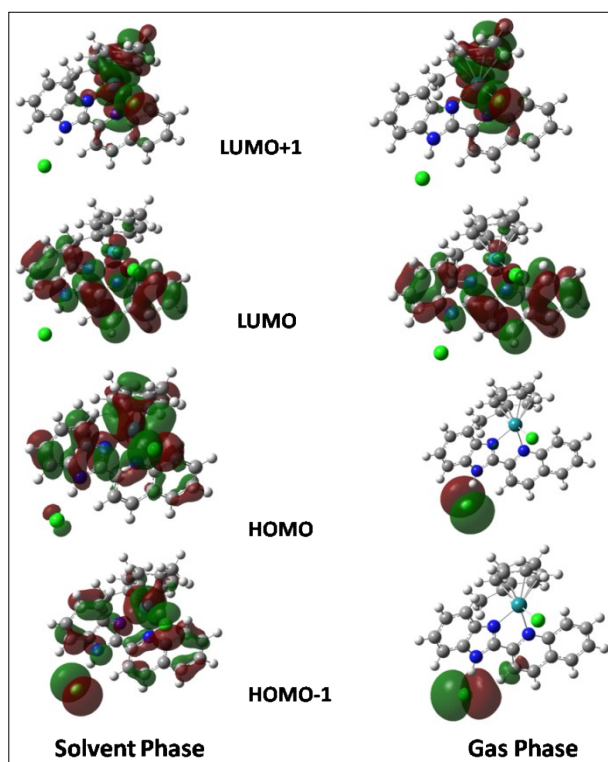

**Figure S45A.** DFT optimized structures of the global minima (with and without solvent) with frontier MOs of 1.

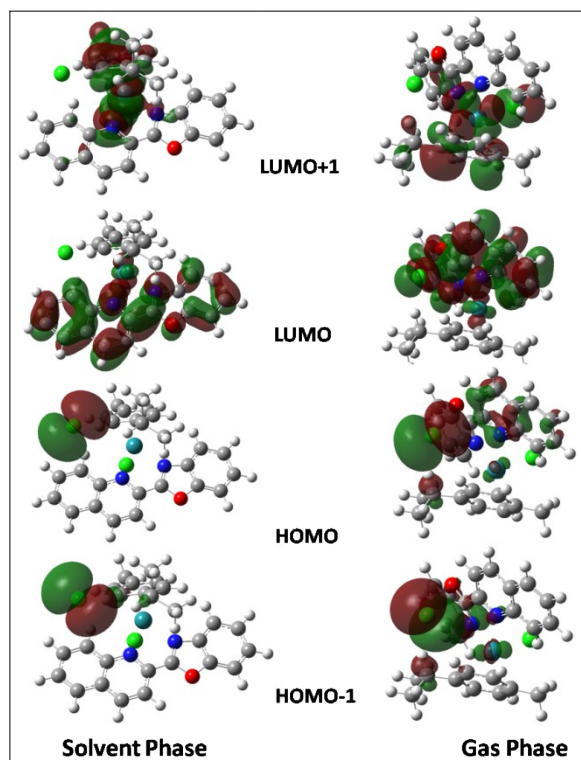

**Figure S45B.** DFT optimized structures of the global minima (with and without solvent) with frontier MOs of 2.

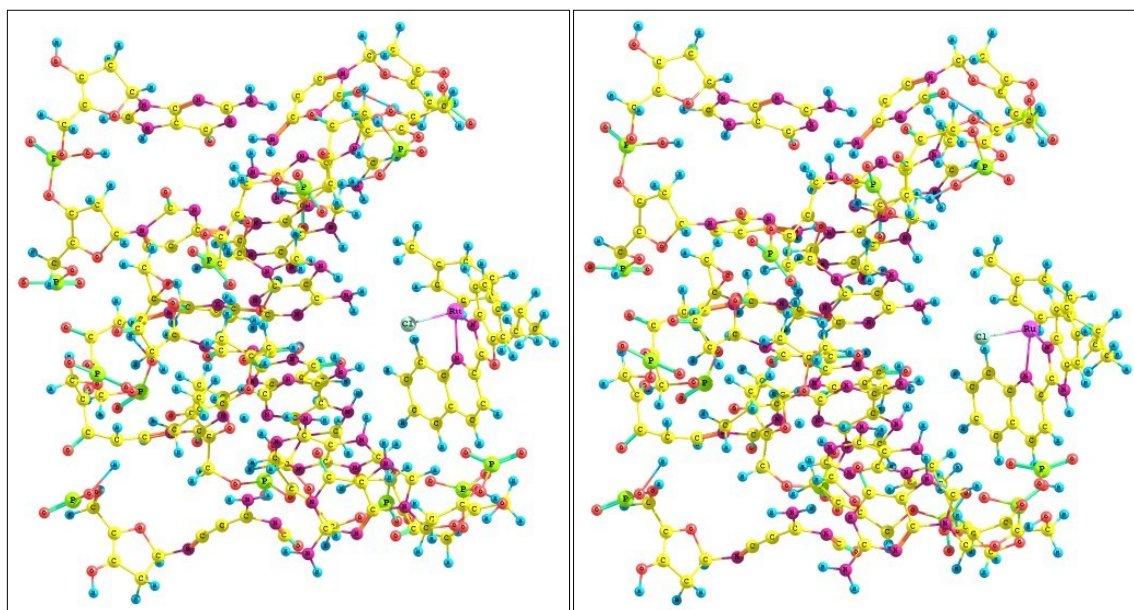

**Figure S46.** Molecular docked model of **1** (right column) and **2** (left column) with B-DNA optimized at PM6 method.

**Table S4.** Selected bond lengths (Å) and bond angles (°) of **1** in DFT optimized structures (at B3LYP/6-31G(d,p)/LanL2DZ level of theory) with and without solvent.

| Structure: <b>1</b>       | Bond length (Å) |               |                        |
|---------------------------|-----------------|---------------|------------------------|
|                           | Gas phase       | Solvent phase | Reference <sup>1</sup> |
| N1–Ru                     | 2.082           | 2.090         | 2.122                  |
| N2–Ru                     | 2.159           | 2.169         | 2.147                  |
| Ru–Cl                     | 2.418           | 2.453         | -                      |
| Ru–C (η <sup>6</sup> Phe) | 2.250           | 2.338         | 2.261                  |
|                           | 2.310           | 2.292         | 2.278                  |
|                           | 2.261           | 2.253         | 2.259                  |
|                           | 2.293           | 2.308         | 2.286                  |
|                           | 2.337           | 2.276         | 2.268                  |
|                           | 2.291           | 2.301         | 2.288                  |
| N3–H                      | 1.107           | 1.052         | -                      |
| H...Cl <sup>-</sup>       | 1.812           | 2.020         | -                      |
| Bond Angles (°)           |                 |               |                        |
| N1–Ru–N2                  | 76.71           | 76.57         | 80.41                  |
| N1–Ru–Cl                  | 87.82           | 87.27         | 84.58                  |
| N2–Ru–Cl                  | 85.91           | 85.97         | 82.28                  |

**Table S5.** Selected bond lengths (Å) and bond angles (°) of **2** in DFT optimized structures (at B3LYP/6-31G(d,p)/LanL2DZ level of theory) of with and without solvent for four different conformers **A**, **B**, **C** and **D**.

| Structure: 2 | Bond length (Å) |               |           |               |           |               |           |               |                        |
|--------------|-----------------|---------------|-----------|---------------|-----------|---------------|-----------|---------------|------------------------|
|              | A               |               | B         |               | C         |               | D         |               | Reference <sup>1</sup> |
|              | Gas phase       | Solvent phase | Gas phase | Solvent phase | Gas phase | Solvent phase | Gas phase | Solvent phase |                        |
| N1–Ru        | 2.098           | 2.103         | 2.112     | 2.106         | 2.131     | 2.106         | 2.107     | 2.107         | 2.122                  |

|                                            |                 |         |       |       |       |       |       |       |       |
|--------------------------------------------|-----------------|---------|-------|-------|-------|-------|-------|-------|-------|
| <b>N2–Ru</b>                               | 2.178           | 2.198   | 2.213 | 2.185 | 2.238 | 2.186 | 2.223 | 2.194 | 2.147 |
| <b>Ru–Cl</b>                               | 2.431           | 2.452   | 2.428 | 2.452 | 2.467 | 2.456 | 2.429 | 2.453 | -     |
| <b>Ru– C (<math>\eta^6</math><br/>Phe)</b> | 2.276           | 2.246   | 2.291 | 2.256 | 2.661 | 2.278 | 2.287 | 2.273 | 2.261 |
|                                            | 2.374           | 2.327   | 2.332 | 2.308 | 2.295 | 2.319 | 2.347 | 2.320 | 2.278 |
|                                            | 2.292           | 2.292   | 2.251 | 2.276 | 2.196 | 2.278 | 2.264 | 2.266 | 2.259 |
|                                            | 2.264           | 2.303   | 2.282 | 2.287 | 2.236 | 2.282 | 2.310 | 2.286 | 2.286 |
|                                            | 2.308           | 2.333   | 2.326 | 2.336 | 2.252 | 2.323 | 2.347 | 2.329 | 2.268 |
|                                            | 2.237           | 2.271   | 2.287 | 2.300 | 2.225 | 2.287 | 2.262 | 2.285 | 2.288 |
| <b>H...Cl<sup>-</sup></b>                  | 2.445           | 2.49939 | 2.353 | 2.466 | 2.406 | 2.460 | 2.132 | 2.458 | -     |
|                                            | Bond Angles (°) |         |       |       |       |       |       |       |       |
| <b>N1–Ru–N2</b>                            | 75.91           | 76.52   | 76.70 | 76.64 | 75.49 | 76.58 | 76.74 | 76.51 | 80.41 |
| <b>N1–Ru–Cl</b>                            | 87.80           | 86.51   | 85.28 | 87.04 | 84.88 | 86.56 | 84.79 | 86.21 | 84.58 |
| <b>N2–Ru–Cl</b>                            | 87.83           | 84.13   | 82.50 | 84.40 | 85.63 | 85.23 | 82.67 | 84.94 | 82.28 |

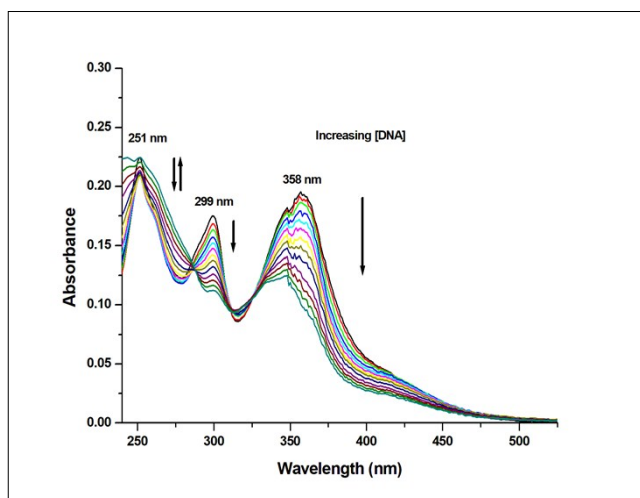

**Figure S47.** UV-Visible absorption titration spectra of **2** (10  $\mu$ M; Milli-Q water) with the addition of varying concentrations of CT-DNA (0-15  $\mu$ M; T<sub>10</sub>E<sub>1</sub> buffer, pH  $\sim$  7.6) at 298 K. UV-Visible absorption spectra of **2** (black).

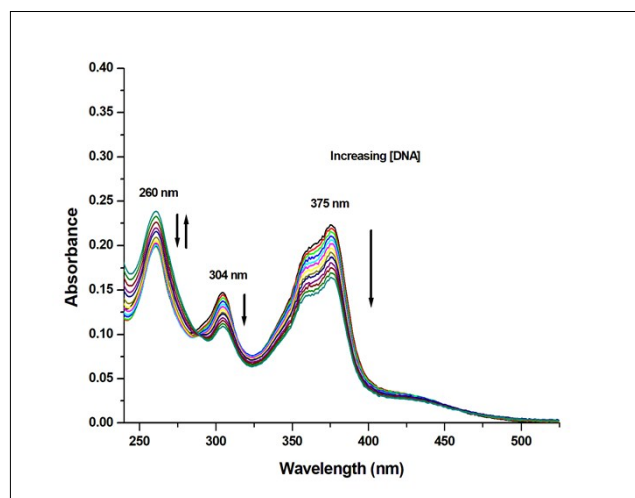

**Figure S48.** UV-Visible absorption titration spectra of **3** (10  $\mu$ M; Milli-Q water) with the addition of varying concentrations of CT-DNA (0-15  $\mu$ M; T<sub>10</sub>E<sub>1</sub> buffer, pH  $\sim$  7.6) at 298 K. UV-Visible absorption spectra of **3** (black).

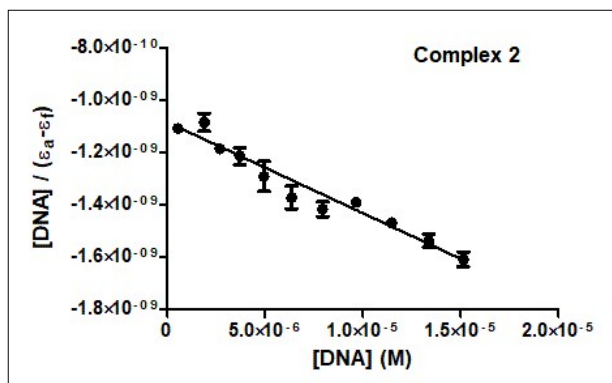

**Figure S49.** Plot for the calculation of equilibrium binding constant ( $K_b$ ) associated with the titration of **2** and CT-DNA at 298 K.

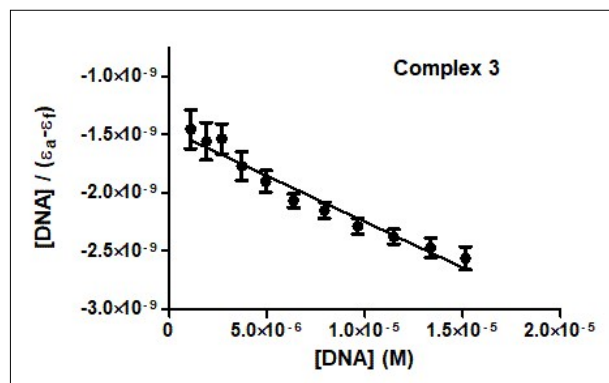

**Figure S50.** Plot for the calculation of equilibrium binding constant ( $K_b$ ) associated with the titration of **3** and CT-DNA at 298 K.

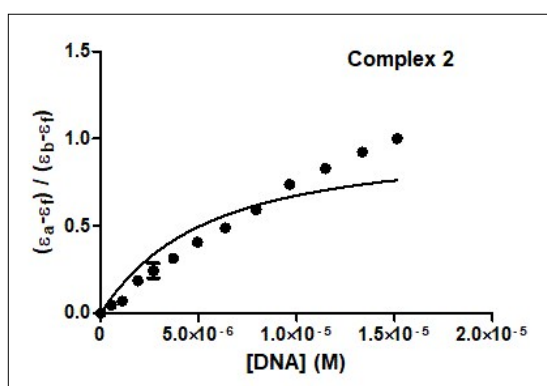

**Figure S51.** Plot to the model of Bard and Thorp associated with the titration of **2** and CT-DNA at 298 K.

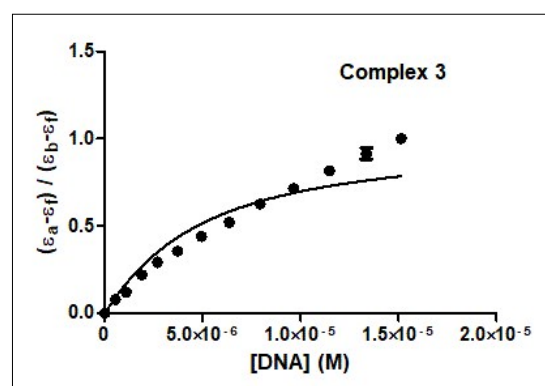

**Figure S52.** Plot to the model of Bard and Thorp associated with the titration of **3** and CT-DNA at 298 K.

**Table S6.** Molar absorptivity changes ( $\Delta\epsilon$ ) for UV-Visible absorption studies of DNA binding with complex **1-3**:

| Complexes | Change in molar absorptivity ( $\Delta\epsilon$ M <sup>-1</sup> cm <sup>-1</sup> ) and Shift in wavelength ( $\Delta\lambda$ nm) |                                                           |                                                         |                                                         |
|-----------|----------------------------------------------------------------------------------------------------------------------------------|-----------------------------------------------------------|---------------------------------------------------------|---------------------------------------------------------|
| <b>1</b>  | 3.47 x 10 <sup>3</sup><br>hypochromic shift<br>(250 nm)                                                                          | 2.90 x 10 <sup>3</sup><br>hyper-chromic<br>shift (250 nm) | 5.64 x 10 <sup>3</sup><br>hypochromic shift<br>(301 nm) | 7.84 x 10 <sup>3</sup><br>hypochromic<br>shift (370 nm) |
|           | 2 nm<br>(Red Shift)                                                                                                              |                                                           | 1 nm<br>(Red Shift)                                     | 6 nm<br>(Red Shift)                                     |
| <b>2</b>  | 1.64 x 10 <sup>3</sup><br>hypochromic shift<br>(251 nm)                                                                          | 1.67 x 10 <sup>3</sup><br>hyper-chromic<br>shift (251 nm) | 6.29 x 10 <sup>3</sup><br>hypochromic shift<br>(299 nm) | 9.41 x 10 <sup>3</sup><br>hypochromic<br>shift (358 nm) |
|           | 1 nm<br>(Red Shift)                                                                                                              |                                                           | 1 nm<br>(Red Shift)                                     | 1 nm<br>(Red Shift)                                     |
| <b>3</b>  | 3.99 x 10 <sup>2</sup><br>hypochromic shift<br>(260 nm)                                                                          | 3.97 x 10 <sup>3</sup><br>hyper-chromic<br>shift (260 nm) | 3.87 x 10 <sup>3</sup><br>hypochromic shift<br>(304 nm) | 5.91 x 10 <sup>3</sup><br>hypochromic<br>shift (375 nm) |
|           | 1 nm<br>(Red Shift)                                                                                                              |                                                           | 1 nm<br>(Red Shift)                                     | 1 nm<br>(Red Shift)                                     |

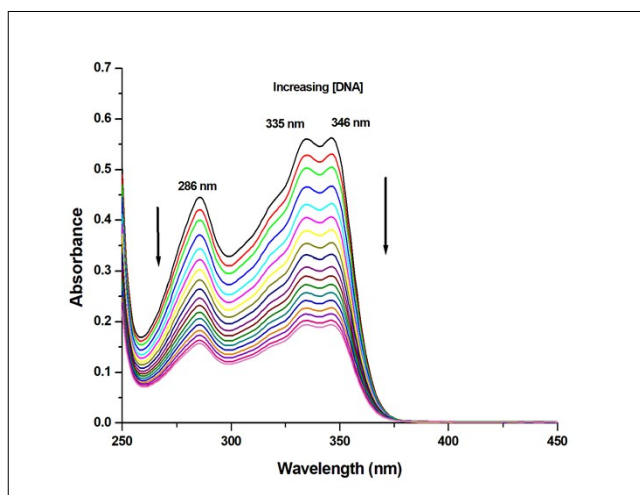

**Figure S53.** UV-Visible absorption titration spectra of **L<sub>1</sub>** (25  $\mu$ M; DMSO:Water (5:100 v/v)) with the addition of varying concentrations of CT-DNA ( $0-4.3 \times 10^{-7}$  M; T<sub>10</sub>E<sub>1</sub> buffer, pH  $\sim 7.6$ ) at 298 K. UV-Visible absorption spectra of **L<sub>1</sub>** (black).

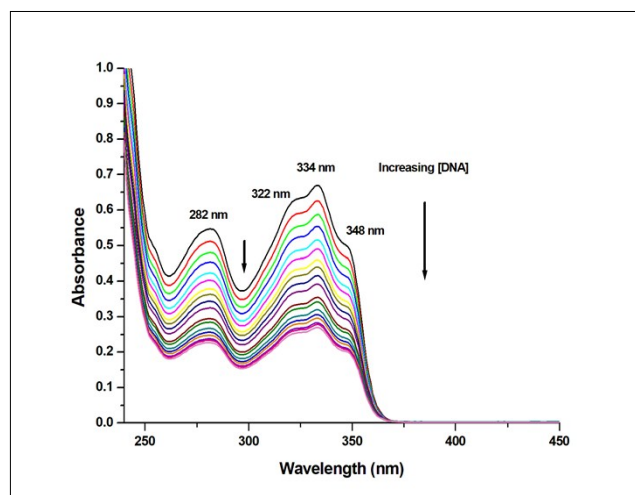

**Figure S54.** UV-Visible absorption titration spectra of **L<sub>2</sub>** (25  $\mu$ M; DMSO:Water (5:100 v/v)) with the addition of varying concentrations of CT-DNA ( $0-4.3 \times 10^{-7}$  M; T<sub>10</sub>E<sub>1</sub> buffer, pH  $\sim 7.6$ ) at 298 K. UV-Visible absorption spectra of **L<sub>2</sub>** (black).

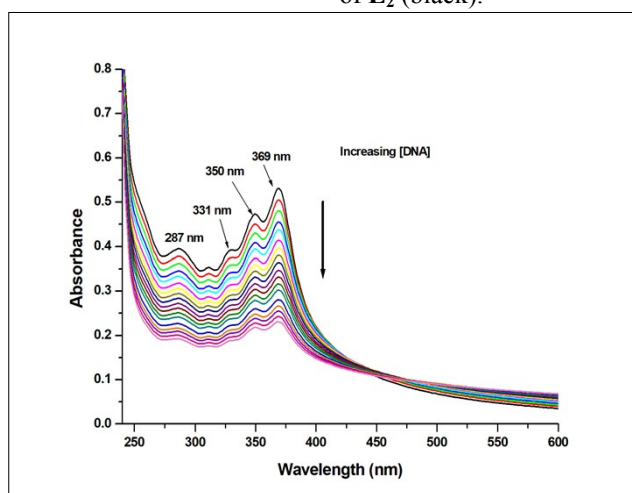

**Figure S55.** UV-Visible absorption titration spectra of **L<sub>3</sub>** (25  $\mu$ M; DMSO:Water (5:100 v/v)) with the addition of varying concentrations of CT-DNA ( $0-4.3 \times 10^{-7}$  M; T<sub>10</sub>E<sub>1</sub> buffer, pH  $\sim 7.6$ ) at 298 K. UV-Visible absorption spectra of **L<sub>3</sub>** (black).

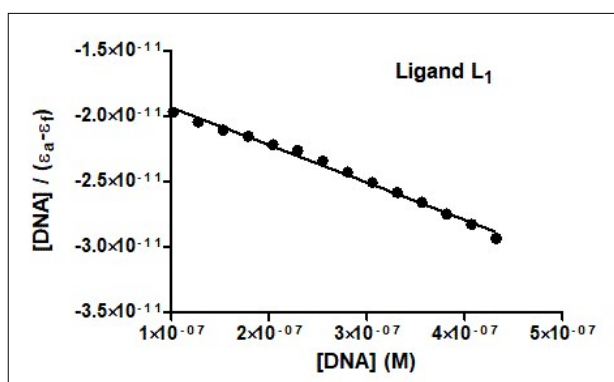

**Figure S56.** Plot for the calculation of equilibrium binding constant ( $K_b$ ) associated with the titration of **L<sub>1</sub>** and CT-DNA at 298 K.

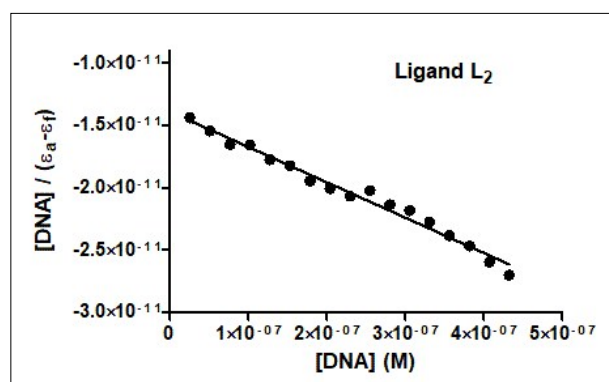

**Figure S57.** Plot for the calculation of equilibrium binding constant ( $K_b$ ) associated with the titration of **L<sub>2</sub>** and CT-DNA at 298 K.



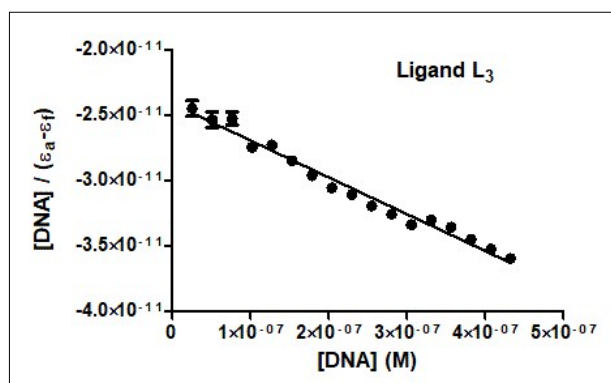

**Figure S58.** Plot for the calculation of equilibrium binding constant ( $K_b$ ) associated with the titration of  $L_3$  and CT-DNA at 298 K.

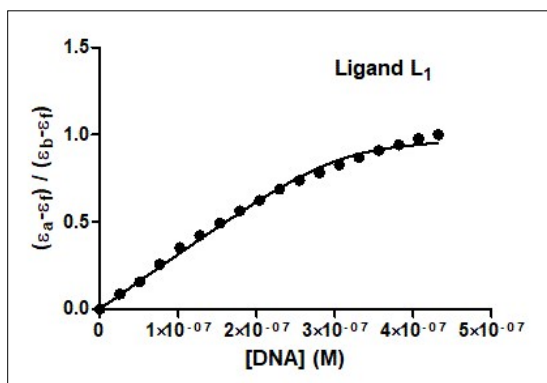

**Figure S59.** Plot to the model of Bard and Thorp associated with the titration of  $L_1$  and CT-DNA at 298 K.

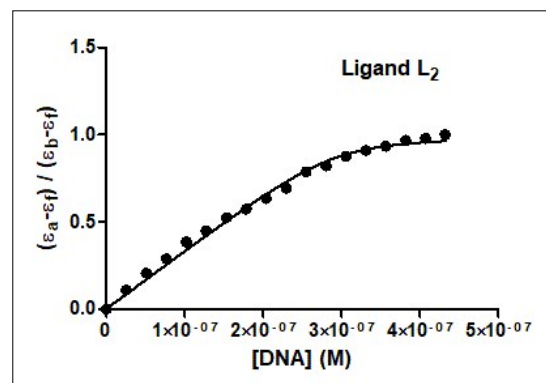

**Figure S60.** Plot to the model of Bard and Thorp associated with the titration of  $L_2$  and CT-DNA at 298 K.

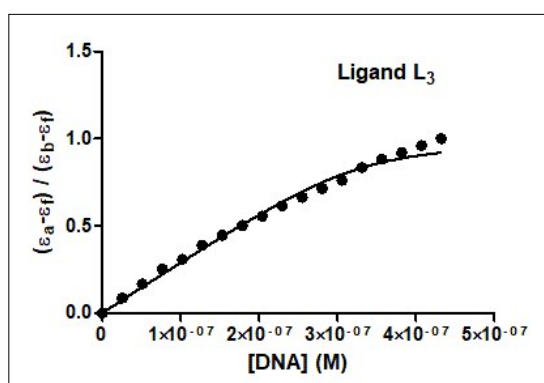

**Figure S61.** Plot to the model of Bard and Thorp associated with the titration of  $L_3$  and CT-DNA at 298 K.

**Table S7.** Data for UV-Visible absorption studies for DNA binding with ligand **L**<sub>1</sub>-**L**<sub>3</sub>:

| Compounds                    | Equilibrium Binding Constant ( $K_b$ )<br>(in $M^{-1}$ ) | Binding site size ( $s$ )<br>(per base pair) |
|------------------------------|----------------------------------------------------------|----------------------------------------------|
| Ligand <b>L</b> <sub>1</sub> | $1.73 \pm 0.03 \times 10^6$                              | 0.0061                                       |
| Ligand <b>L</b> <sub>2</sub> | $2.04 \pm 0.03 \times 10^6$                              | 0.0058                                       |
| Ligand <b>L</b> <sub>3</sub> | $1.16 \pm 0.02 \times 10^6$                              | 0.0065                                       |

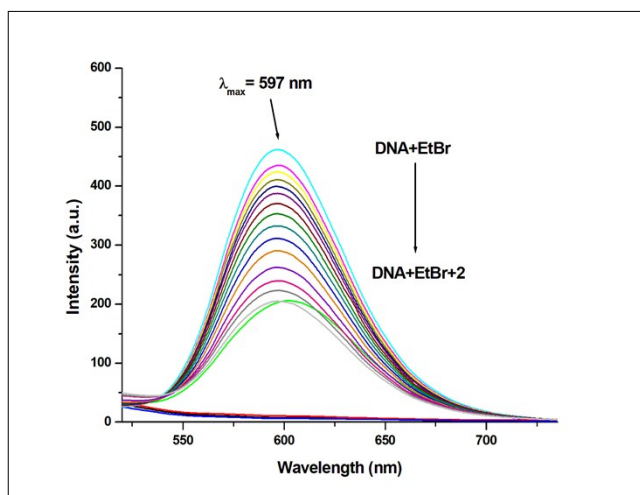

**Figure S62.** Molecular fluorescence emission profile associated with titration of EthBr-DNA (35  $\mu$ M;  $T_{10}E_1$  buffer, pH  $\sim$  7.6;  $\lambda_{ex}$ . 480 nm;  $\lambda_{em}$ . 597 nm) with the addition of varying concentrations of **2** (0-360  $\mu$ M; Milli-Q water) at 298 K. Fluorescence spectra of only buffer (black), only DNA (red) and only EthBr (green) only **2** (blue) and EthBr-DNA(cyan).

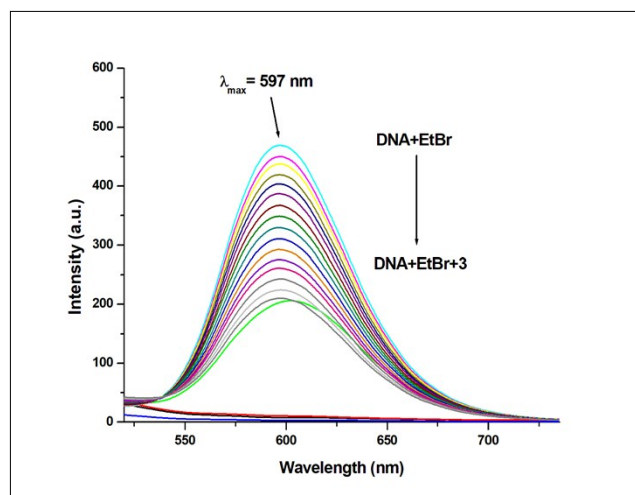

**Figure S63.** Molecular fluorescence emission profile associated with titration of EthBr-DNA (35  $\mu$ M;  $T_{10}E_1$  buffer, pH  $\sim$  7.6;  $\lambda_{ex}$ . 480 nm;  $\lambda_{em}$ . 597 nm) with the addition of varying concentrations of **3** (0-270  $\mu$ M; Milli-Q water) at 298 K. Fluorescence spectra of only buffer (black), only DNA (red) and only EthBr (green) only **3** (blue) and EthBr-DNA(cyan).

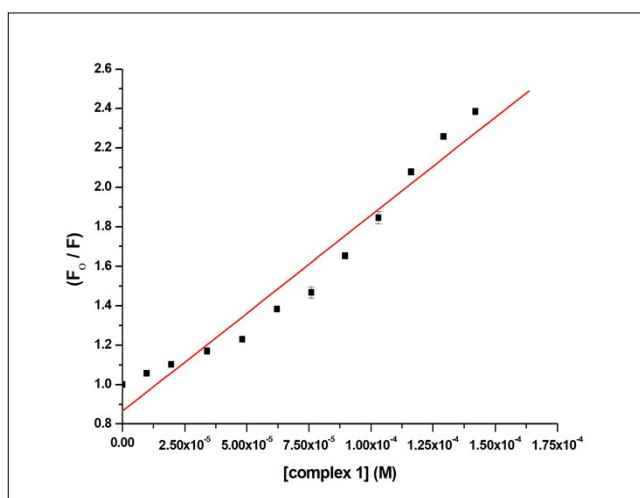

**Figure S64.** Stern-Volmer plot for the calculation of quenching constant ( $K_{SV}$ ) associated with the titration of EthBr-DNA and **1** at 298 K.

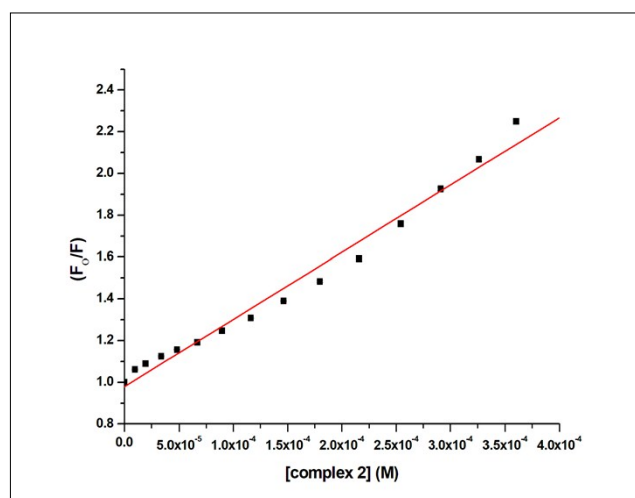

**Figure S65.** Stern-Volmer plot for the calculation of quenching constant ( $K_{SV}$ ) associated with the titration of EthBr-DNA and **2** at 298 K.

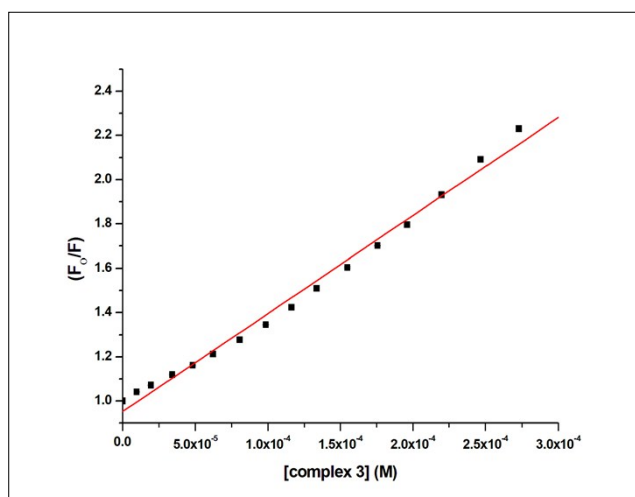

**Figure S66.** Stern-Volmer plot for the calculation of quenching constant ( $K_{SV}$ ) associated with the titration of EthBr-DNA and **3** at 298 K.

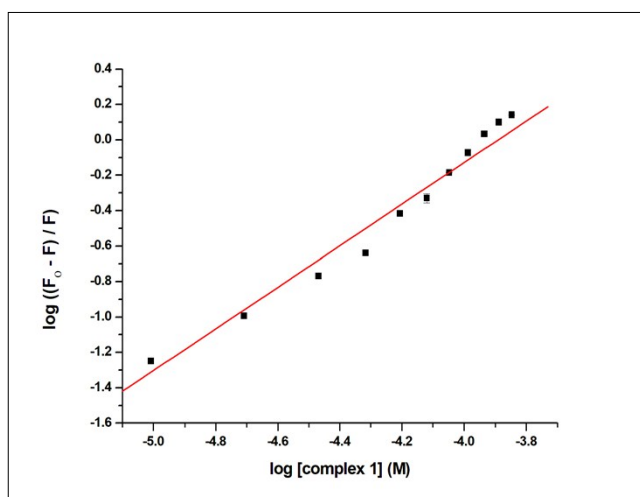

**Figure S67.** Scatchard plot for the calculation of association constant ( $K_a$ ) related with the interaction of EthBr-DNA and **1** at 298 K.

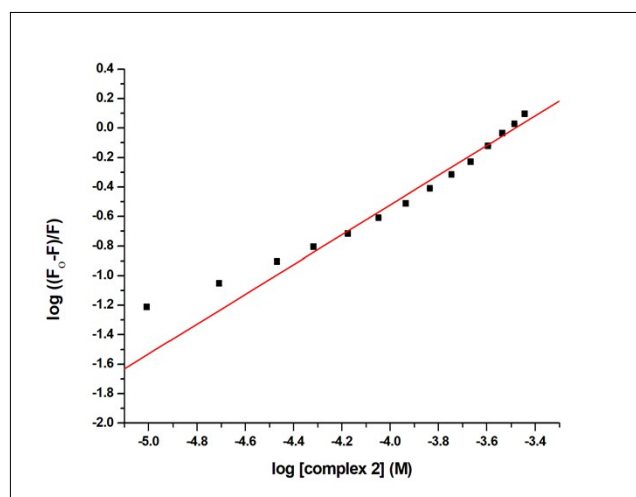

**Figure S68.** Scatchard plot for the calculation of association constant ( $K_a$ ) related with the interaction of EthBr-DNA and **2** at 298 K.

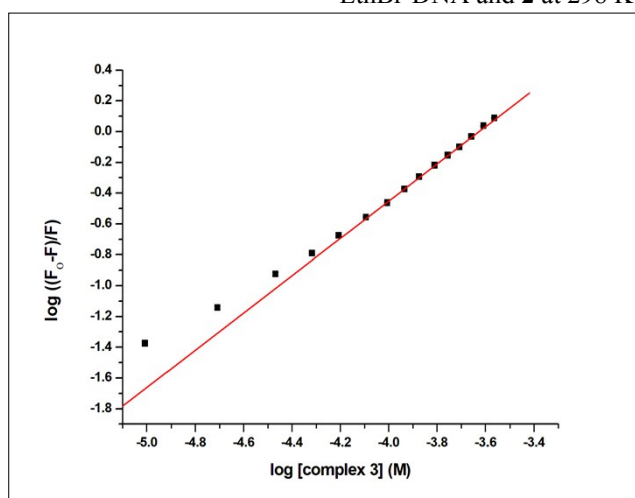

**Figure S69.** Scatchard plot for the calculation of association constant ( $K_a$ ) related with the interaction of EthBr-DNA and **3** at 298 K.

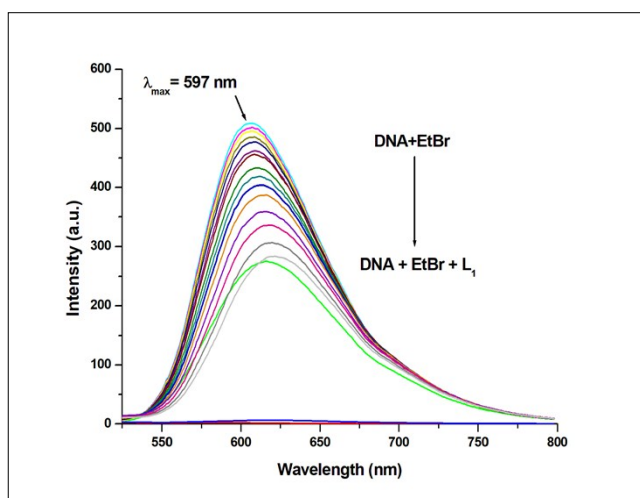

**Figure S70.** Molecular fluorescence emission profile associated with titration of EthBr-DNA (35  $\mu$ M; T<sub>10</sub>E<sub>1</sub> buffer, pH  $\sim$  7.6;  $\lambda_{ex}$  480 nm;  $\lambda_{em}$  597 nm) with the addition of varying concentrations of L<sub>1</sub> (0-7.24  $\times$  10<sup>-4</sup> M; DMSO:Water (5:100 v/v)) at 298 K. Fluorescence spectra of only buffer (black), only DNA (red) and only EthBr (green) only **2** (blue) and EthBr-DNA(cyan).

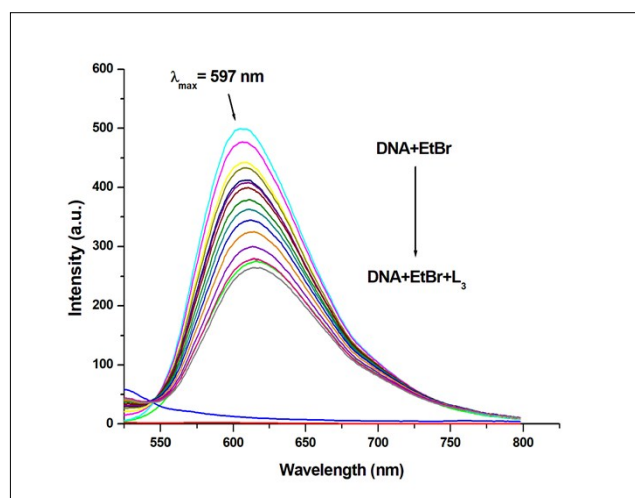

**Figure S71.** Molecular fluorescence emission profile associated with titration of EthBr-DNA (35  $\mu$ M; T<sub>10</sub>E<sub>1</sub> buffer, pH  $\sim$  7.6;  $\lambda_{ex}$  480 nm;  $\lambda_{em}$  597 nm) with the addition of varying concentrations of L<sub>3</sub> (0-4.42  $\times$  10<sup>-4</sup> M; DMSO:Water (5:100 v/v)) at 298 K. Fluorescence spectra of only buffer (black), only DNA (red) and only EthBr (green) only **2** (blue) and EthBr-DNA(cyan).

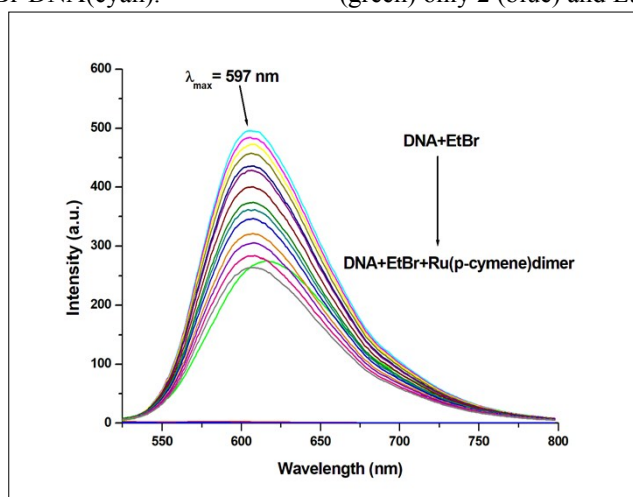

**Figure S72.** Molecular fluorescence emission profile associated with titration of EthBr-DNA (35  $\mu$ M; T<sub>10</sub>E<sub>1</sub> buffer, pH  $\sim$  7.6;  $\lambda_{ex}$  480 nm;  $\lambda_{em}$  597 nm) with the addition of varying concentrations of Ru(p-cymene)dimer (0-6.03  $\times$  10<sup>-4</sup> M; Milli-Q water) at 298 K. Fluorescence spectra of only buffer (black), only DNA (red) and only EthBr (green) only **2** (blue) and EthBr-DNA(cyan).

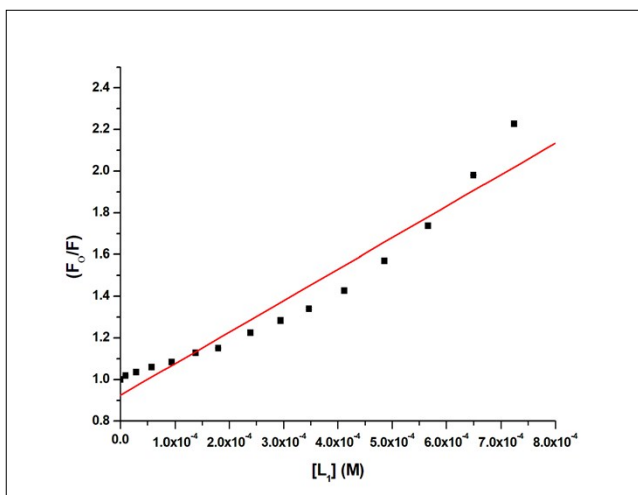

**Figure S73.** Stern-Volmer plot for the calculation of quenching constant ( $K_{SV}$ ) associated with the titration of EthBr-DNA and  $L_1$  at 298 K.

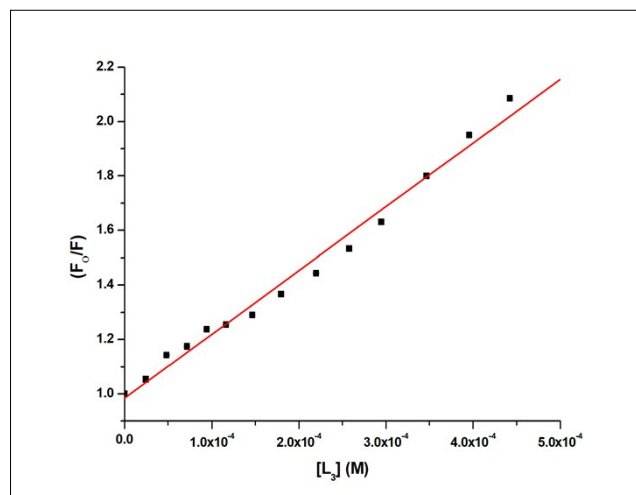

**Figure S74.** Stern-Volmer plot for the calculation of quenching constant ( $K_{SV}$ ) associated with the titration of EthBr-DNA and  $L_3$  at 298 K.

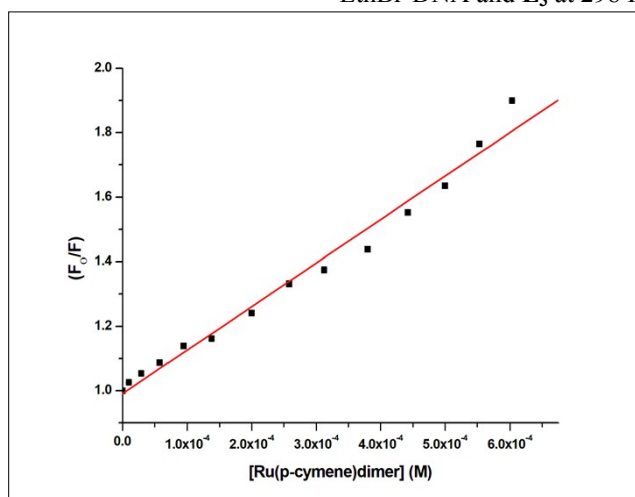

**Figure S75.** Stern-Volmer plot for the calculation of quenching constant ( $K_{SV}$ ) associated with the titration of EthBr-DNA and Ru(p-cymene)dimer at 298 K.

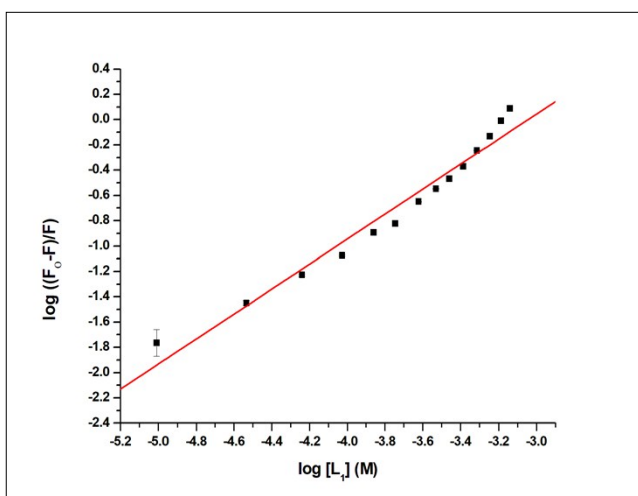

**Figure S76.** Scatchard plot for the calculation of association constant ( $K_a$ ) related with the interaction of EthBr-DNA and  $L_1$  at 298 K.

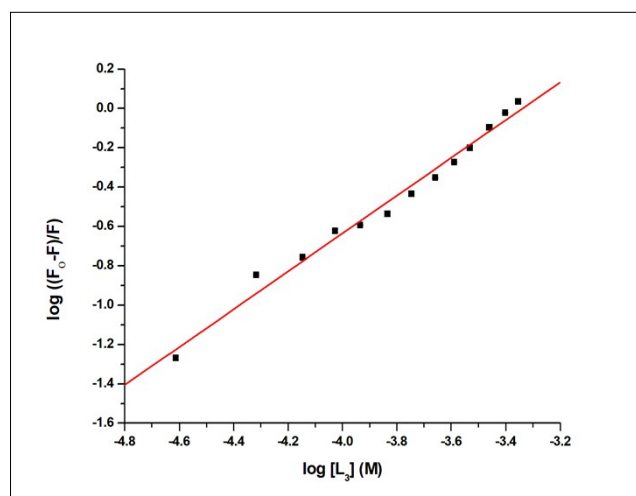

**Figure S77.** Scatchard plot for the calculation of association constant ( $K_a$ ) related with the interaction of EthBr-DNA and  $L_3$  at 298 K.

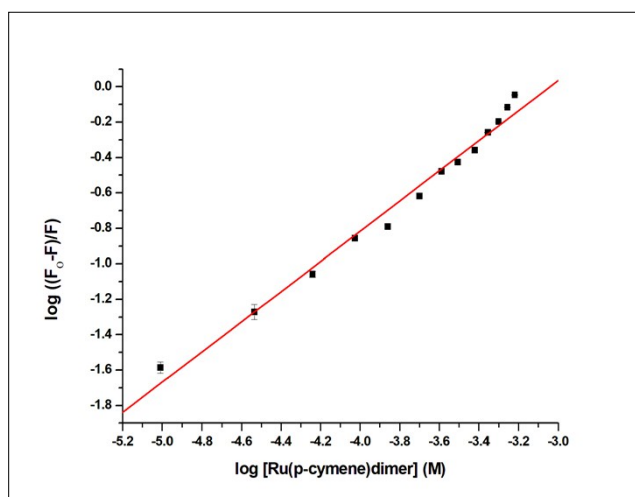

**Figure S78.** Scatchard plot for the calculation of association constant ( $K_a$ ) related with the interaction of EthBr-DNA and Ru(p-cymene)dimer at 298 K.

**Table S8.** Data for emission spectroscopic studies for DNA binding with ligand  $L_1$ ,  $L_3$  and Ru(p-cymene)dimer:

| Compounds         | Quenching constant ( $K_{SV}$ ) ( $M^{-1}$ ) | Association Constant ( $K_a$ ) ( $M^{-1}$ ) | No. of binding site (n) |
|-------------------|----------------------------------------------|---------------------------------------------|-------------------------|
| Ligand $L_1$      | $1.51 \pm 0.023 \times 10^3$                 | $1.10 \pm 0.32 \times 10^3$                 | 0.98                    |
| Ligand $L_3$      | $2.34 \pm 0.033 \times 10^3$                 | $1.62 \pm 0.06 \times 10^3$                 | 0.96                    |
| Ru(p-cymene)dimer | $1.35 \pm 0.027 \times 10^3$                 | $4.01 \pm 0.67 \times 10^2$                 | 0.85                    |

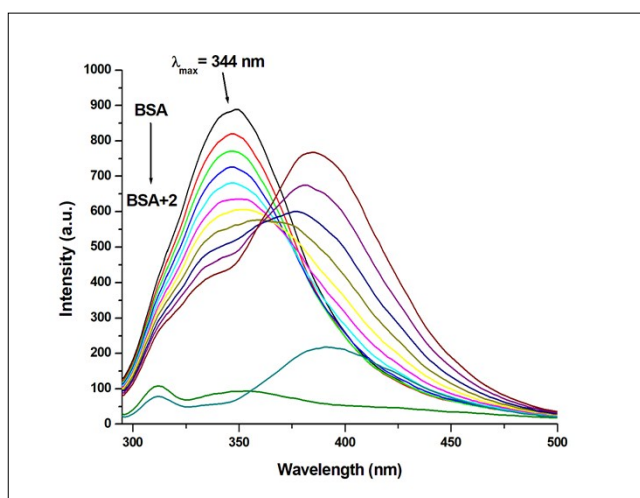

**Figure S79.** Molecular fluorescence emission profile associated with titration of BSA (0.15  $\mu$ M; PBS, pH  $\sim$  7.4;  $\lambda_{ex}$ . 280 nm;  $\lambda_{em}$ . 344 nm) with the addition of varying concentrations of **2** (0-16  $\mu$ M; PBS, pH  $\sim$  7.4) at 298 K. Fluorescence spectra of BSA (black), only buffer (dark green) and only complex (ocean blue).

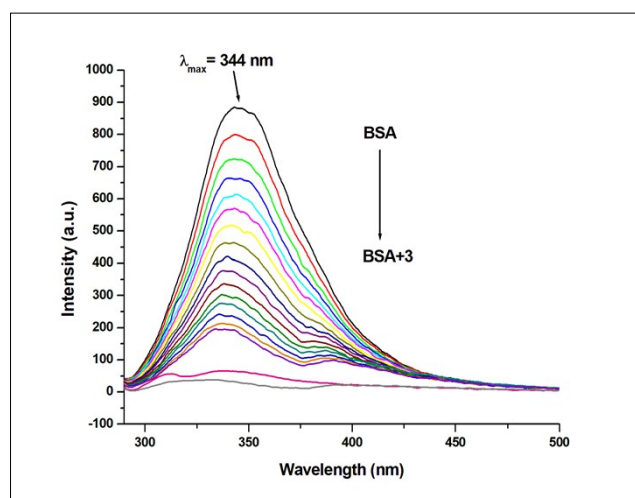

**Figure S80.** Molecular fluorescence emission profile associated with titration of BSA (0.15  $\mu$ M; PBS, pH  $\sim$  7.4;  $\lambda_{ex}$ . 280 nm;  $\lambda_{em}$ . 344 nm) with the addition of varying concentrations of **3** (0-16  $\mu$ M; PBS, pH  $\sim$  7.4) at 298 K. Fluorescence spectra of BSA (black), only buffer (pink) and only complex (grey).

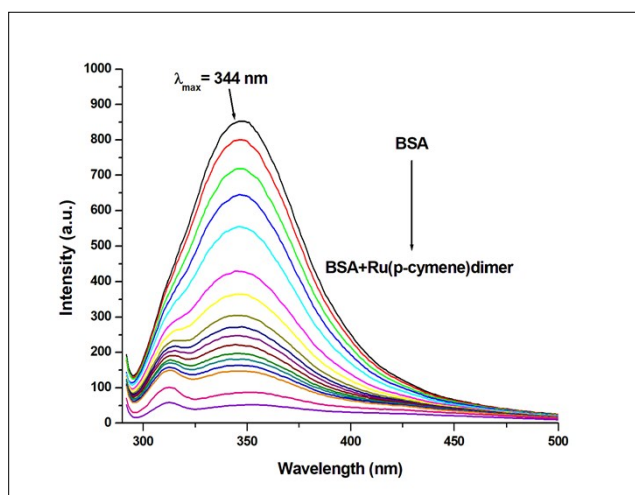

**Figure S81.** Molecular fluorescence emission profile associated with titration of BSA (0.15  $\mu\text{M}$ ; PBS, pH  $\sim 7.4$ ;  $\lambda_{\text{ex}}$  280 nm;  $\lambda_{\text{em}}$  344 nm) with the addition of varying concentrations of Ru(p-cymene)dimer (0-16  $\mu\text{M}$ ; PBS, pH  $\sim 7.4$ ) at 298 K. Fluorescence spectra of BSA (black), only buffer (purple) and only complex (pink).

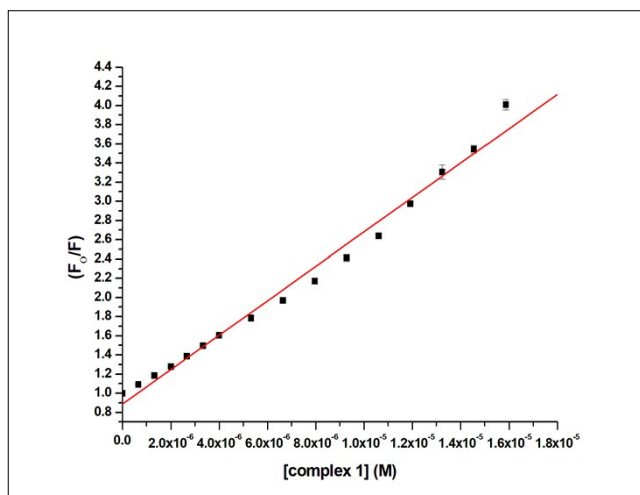

**Figure S82.** Stern-Volmer plot for the calculation of quenching constant ( $K_{\text{SV}}$ ) associated with the interaction of BSA and 1 at 298 K.

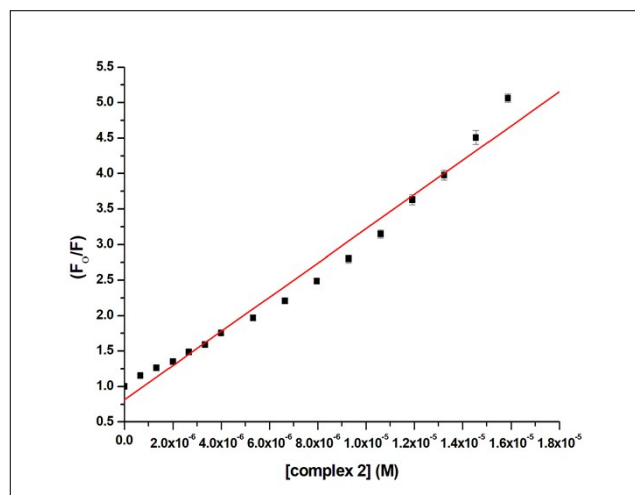

**Figure S83.** Stern-Volmer plot for the calculation of quenching constant ( $K_{\text{SV}}$ ) associated with the interaction of BSA and 2 at 298 K.

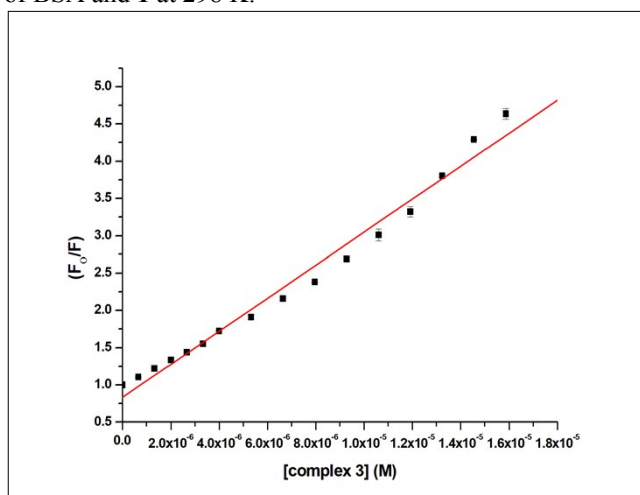

**Figure S84.** Stern-Volmer plot for the calculation of quenching constant ( $K_{\text{SV}}$ ) associated with the interaction of BSA and 3 at 298 K.

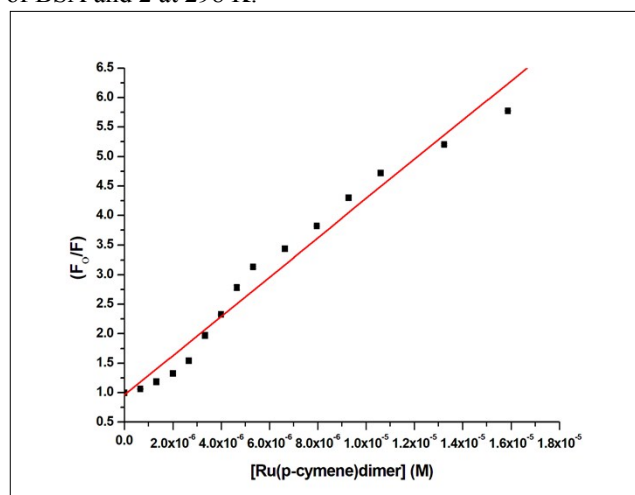

**Figure S85.** Stern-Volmer plot for the calculation of quenching constant ( $K_{\text{SV}}$ ) associated with the interaction of BSA and Ru(p-cymene)dimer at 298 K.



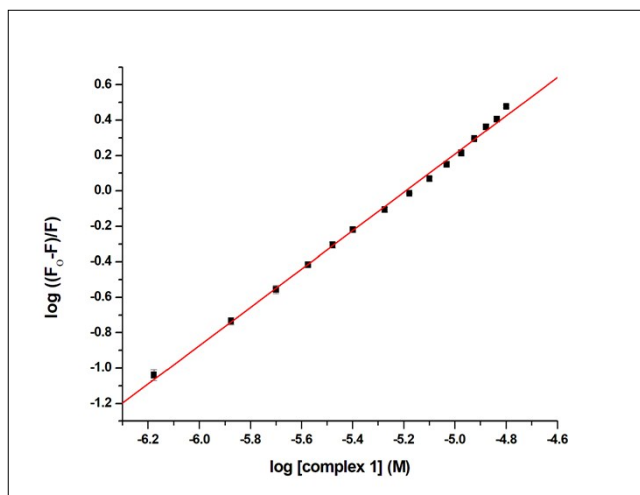

**Figure S86.** Scatchard plot for the calculation of binding constant ( $K_b$ ) associated with the interaction of BSA and **1** at 298 K.

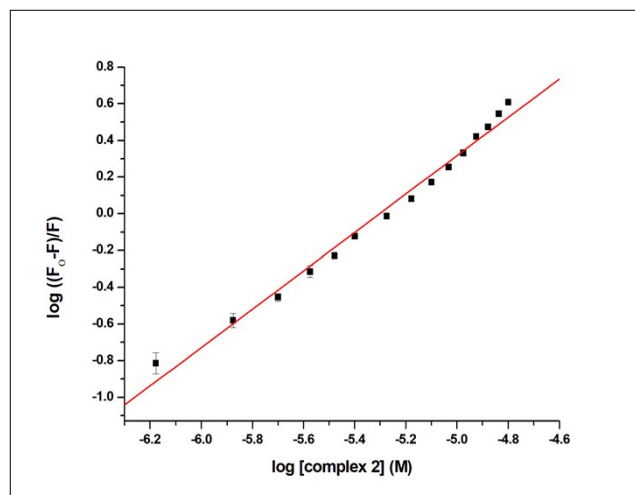

**Figure S87.** Scatchard plot for the calculation of binding constant ( $K_b$ ) associated with the interaction of BSA and **2** at 298 K.

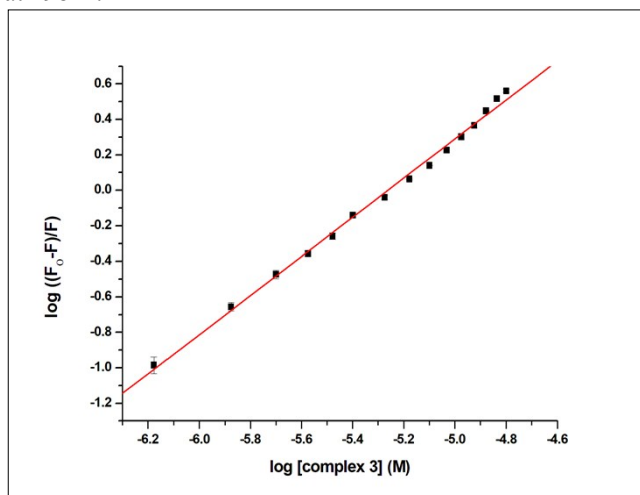

**Figure S88.** Scatchard plot for the calculation of binding constant ( $K_b$ ) associated with the interaction of BSA and **3** at 298 K.

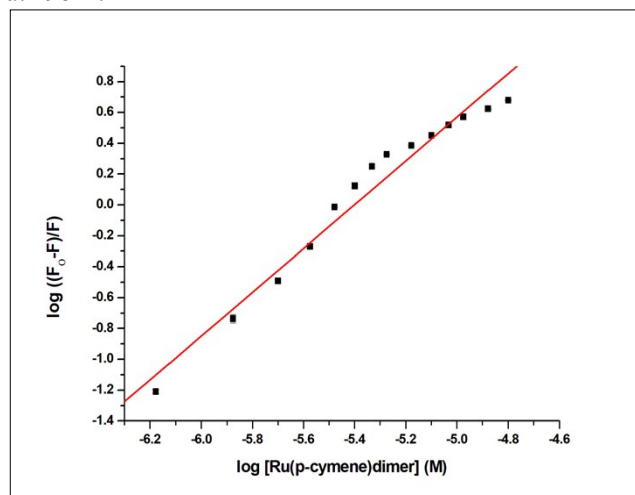

**Figure S89.** Scatchard plot for the calculation of binding constant ( $K_b$ ) associated with the interaction of BSA and Ru(p-cymene)dimer at 298 K.

**Table S9.** Data for emission spectroscopic studies for BSA interaction with Ru(p-cymene)dimer:

| Complex           | Quenching constant<br>( $K_{SV}$ ) ( $M^{-1}$ ) | Binding Constant<br>( $K_b$ ) ( $M^{-1}$ ) | No. of<br>binding site<br>( $n$ ) |
|-------------------|-------------------------------------------------|--------------------------------------------|-----------------------------------|
| Ru(p-cymene)dimer | $3.32 \pm 0.099 \times 10^5$                    | $4.73 \pm 0.84 \times 10^7$                | 1.42                              |

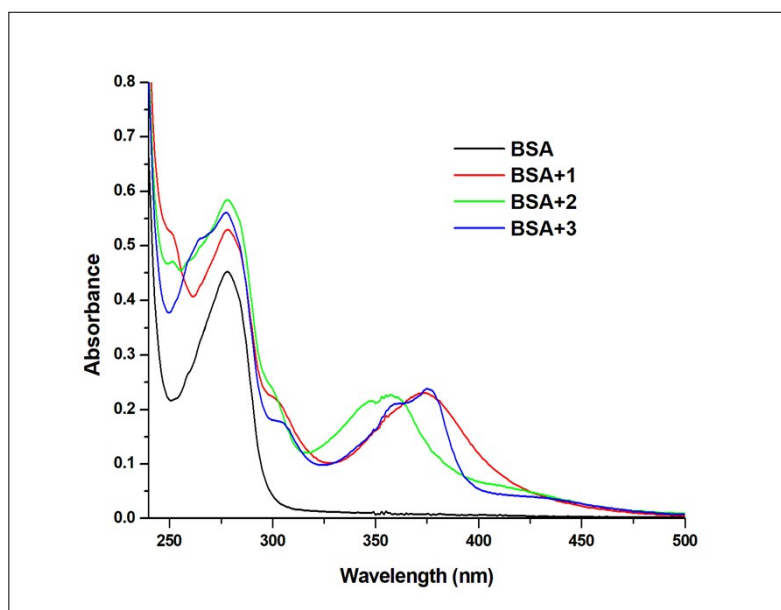

**Figure S90.** UV-Visible absorption spectra of BSA (10  $\mu$ M; PBS, pH  $\sim$  7.4) in presence of **1-3** (10  $\mu$ M; PBS, pH  $\sim$  7.4) at 298 K.

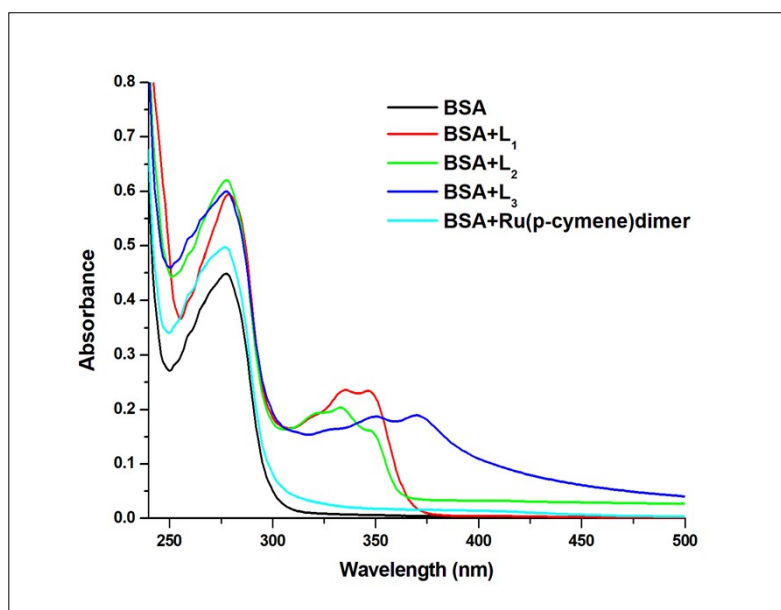

**Figure S91.** UV-Visible absorption spectra of BSA (10  $\mu$ M; PBS, pH  $\sim$  7.4) in presence of **L<sub>1</sub>**, **L<sub>2</sub>**, **L<sub>3</sub>** and Ru(p-cymene)dimer (10  $\mu$ M; DMSO:Water (5:100 v/v)) at 298 K.

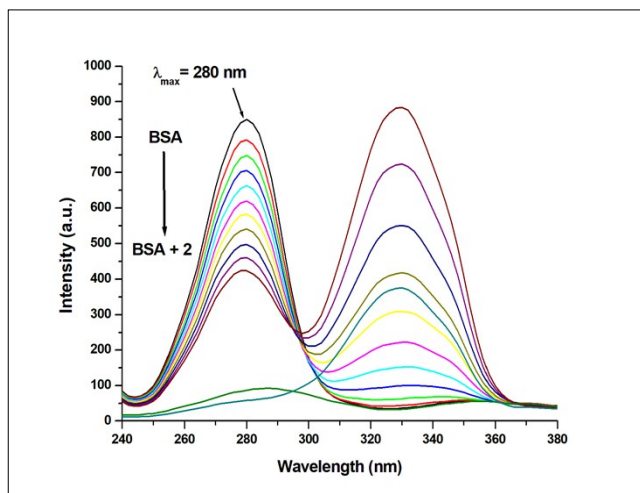

**Figure S92.** Synchronous fluorescence emission profile associated with titration of BSA (0.15  $\mu\text{M}$ ; PBS, pH  $\sim$  7.4) with the addition of varying concentrations of **2** (0-16  $\mu\text{M}$ ; PBS, pH  $\sim$  7.4) at the wavelength difference of  $\Delta\lambda = 60$  nm. Fluorescence spectra of BSA (black), only buffer (dark green) and only complex (ocean blue).

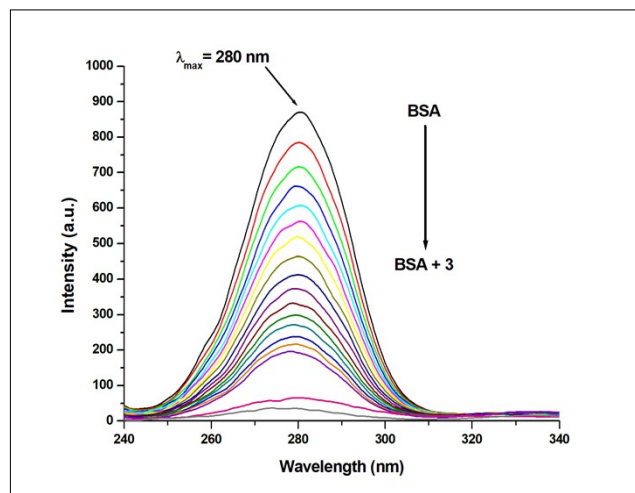

**Figure S93.** Synchronous fluorescence emission profile associated with titration of BSA (0.15  $\mu\text{M}$ ; PBS, pH  $\sim$  7.4) with the addition of varying concentrations of **3** (0-16  $\mu\text{M}$ ; PBS, pH  $\sim$  7.4) at the wavelength difference of  $\Delta\lambda = 60$  nm. Fluorescence spectra of BSA (black), only buffer (pink) and only complex (grey).

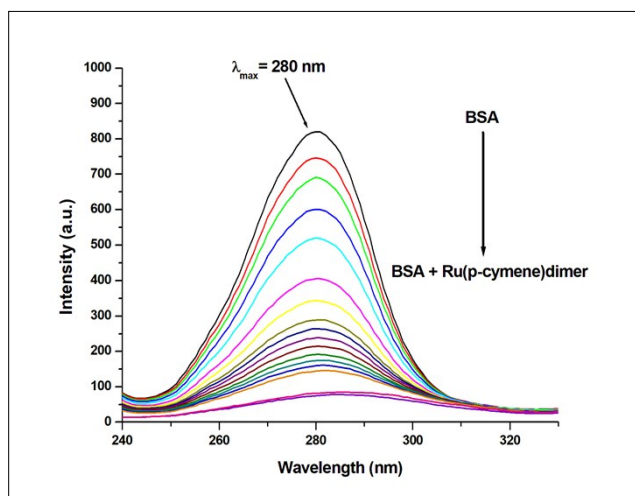

**Figure S94.** Synchronous fluorescence emission profile associated with titration of BSA (0.15  $\mu\text{M}$ ; PBS, pH  $\sim$  7.4) with the addition of varying concentrations of Ru(p-cymene)dimer (0-16  $\mu\text{M}$ ; PBS, pH  $\sim$  7.4) at the wavelength difference of  $\Delta\lambda = 60$  nm. Fluorescence spectra of BSA (black), only buffer (purple) and only complex (pink).

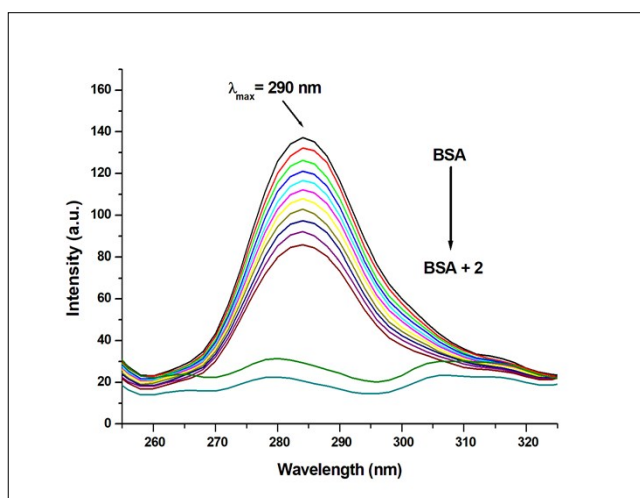

**Figure S95.** Synchronous fluorescence emission profile associated with titration of BSA (0.15  $\mu\text{M}$ ; PBS, pH  $\sim$  7.4) with the addition of varying concentrations of **2** (0-16  $\mu\text{M}$ ; PBS, pH  $\sim$  7.4) at the wavelength difference of  $\Delta\lambda = 15$  nm. Fluorescence spectra of BSA (black), only buffer (dark green) and only complex (ocean blue).

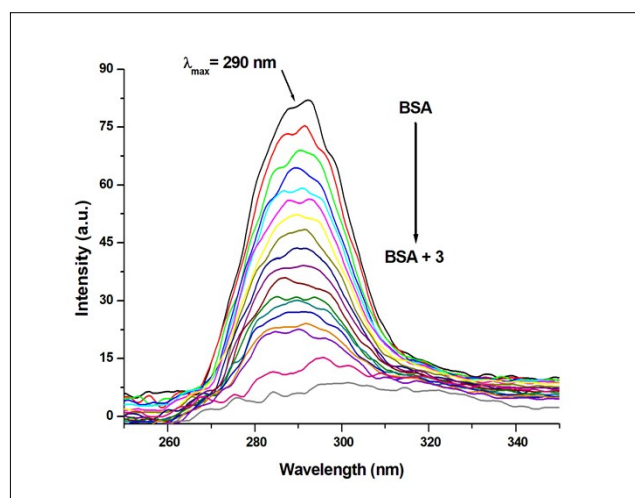

**Figure S96.** Synchronous fluorescence emission profile associated with titration of BSA (0.15  $\mu\text{M}$ ; PBS, pH  $\sim$  7.4) with the addition of varying concentrations of **3** (0-16  $\mu\text{M}$ ; PBS, pH  $\sim$  7.4) at the wavelength difference of  $\Delta\lambda = 15$  nm. Fluorescence spectra of BSA (black), only buffer (pink) and only complex (grey).

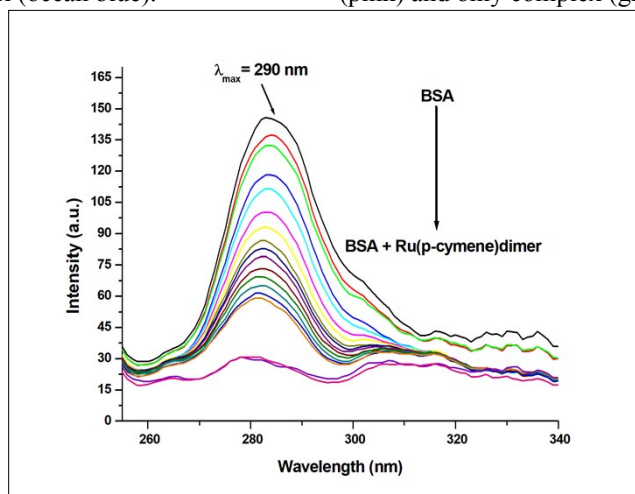

**Figure S97.** Synchronous fluorescence emission profile associated with titration of BSA (0.15  $\mu\text{M}$ ; PBS, pH  $\sim$  7.4) with the addition of varying concentrations of Ru(p-cymene)dimer (0-16  $\mu\text{M}$ ; PBS, pH  $\sim$  7.4) at the wavelength difference of  $\Delta\lambda = 15$  nm. Fluorescence spectra of BSA (black), only buffer (purple) and only complex (pink).

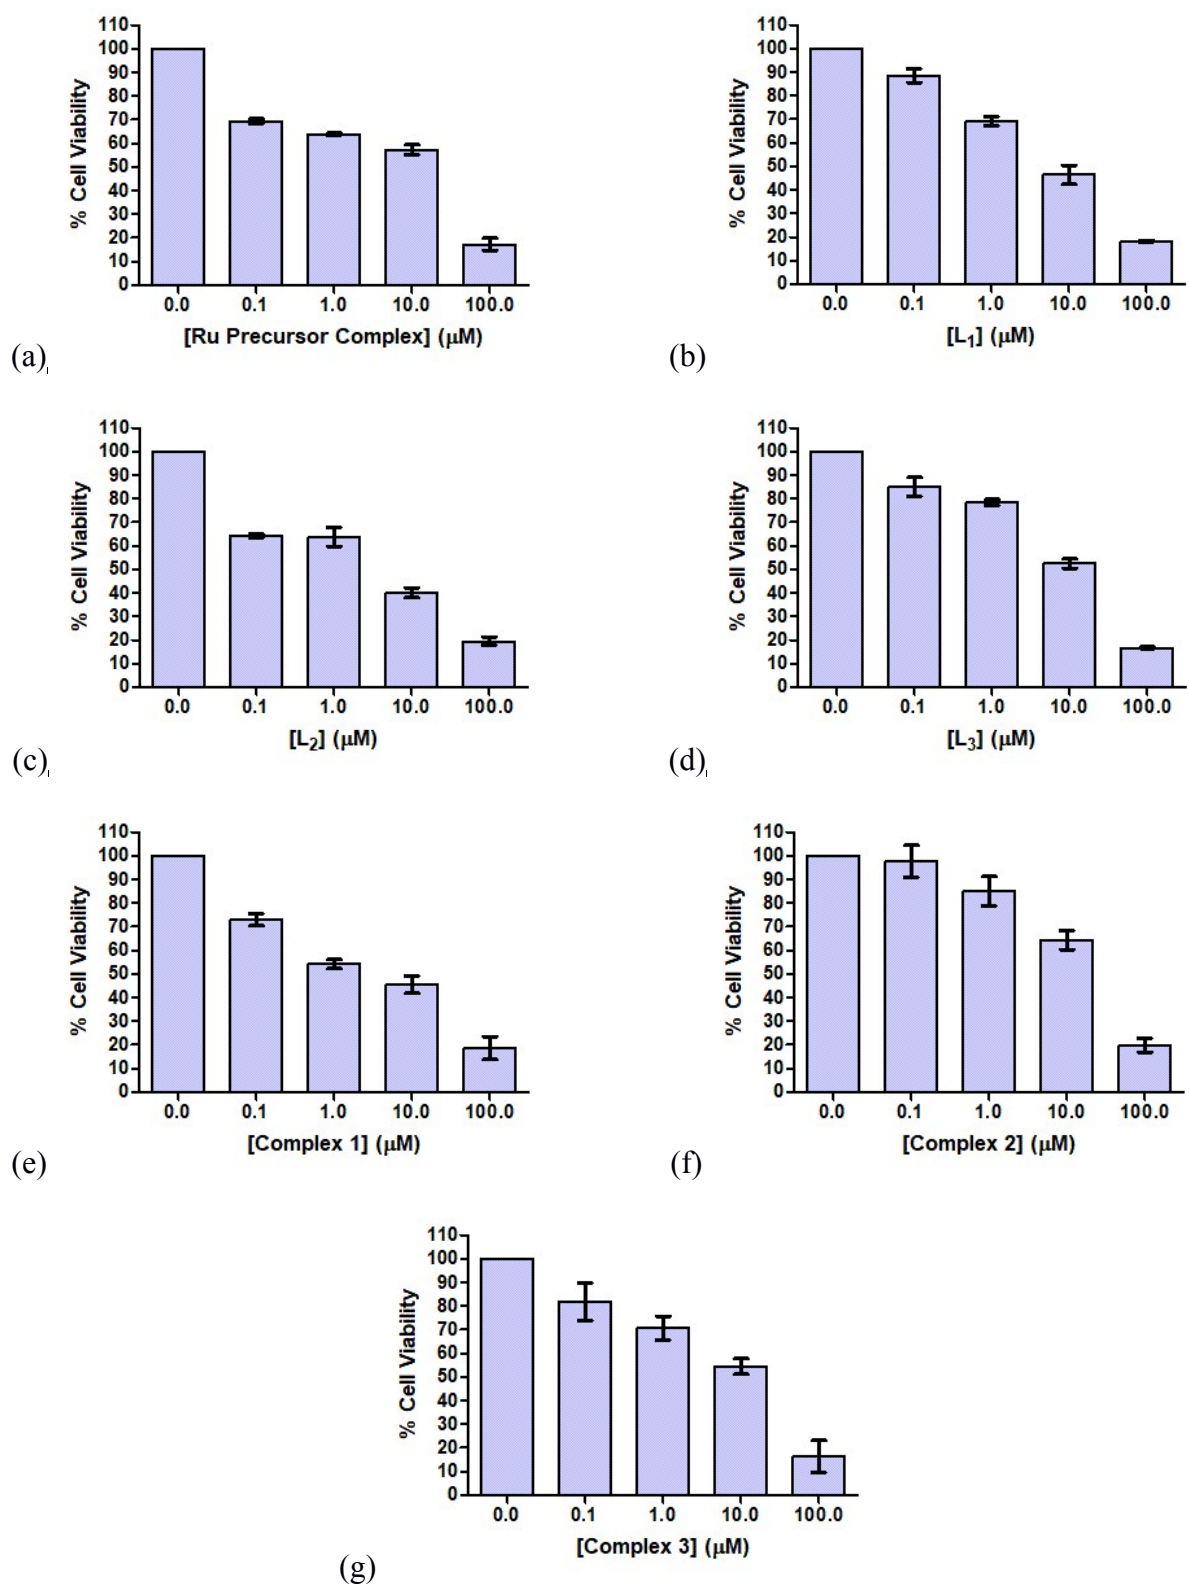

**Figure S98.** *In vitro* cytotoxicity of Ru precursor complex (a),  $\text{L}_1$  (b),  $\text{L}_2$  (c),  $\text{L}_3$  (d), complex 1 (e), complex 2 (f) and complex 3 (g) against MCF-7 cell lines measured by MTT assay after 48 h.

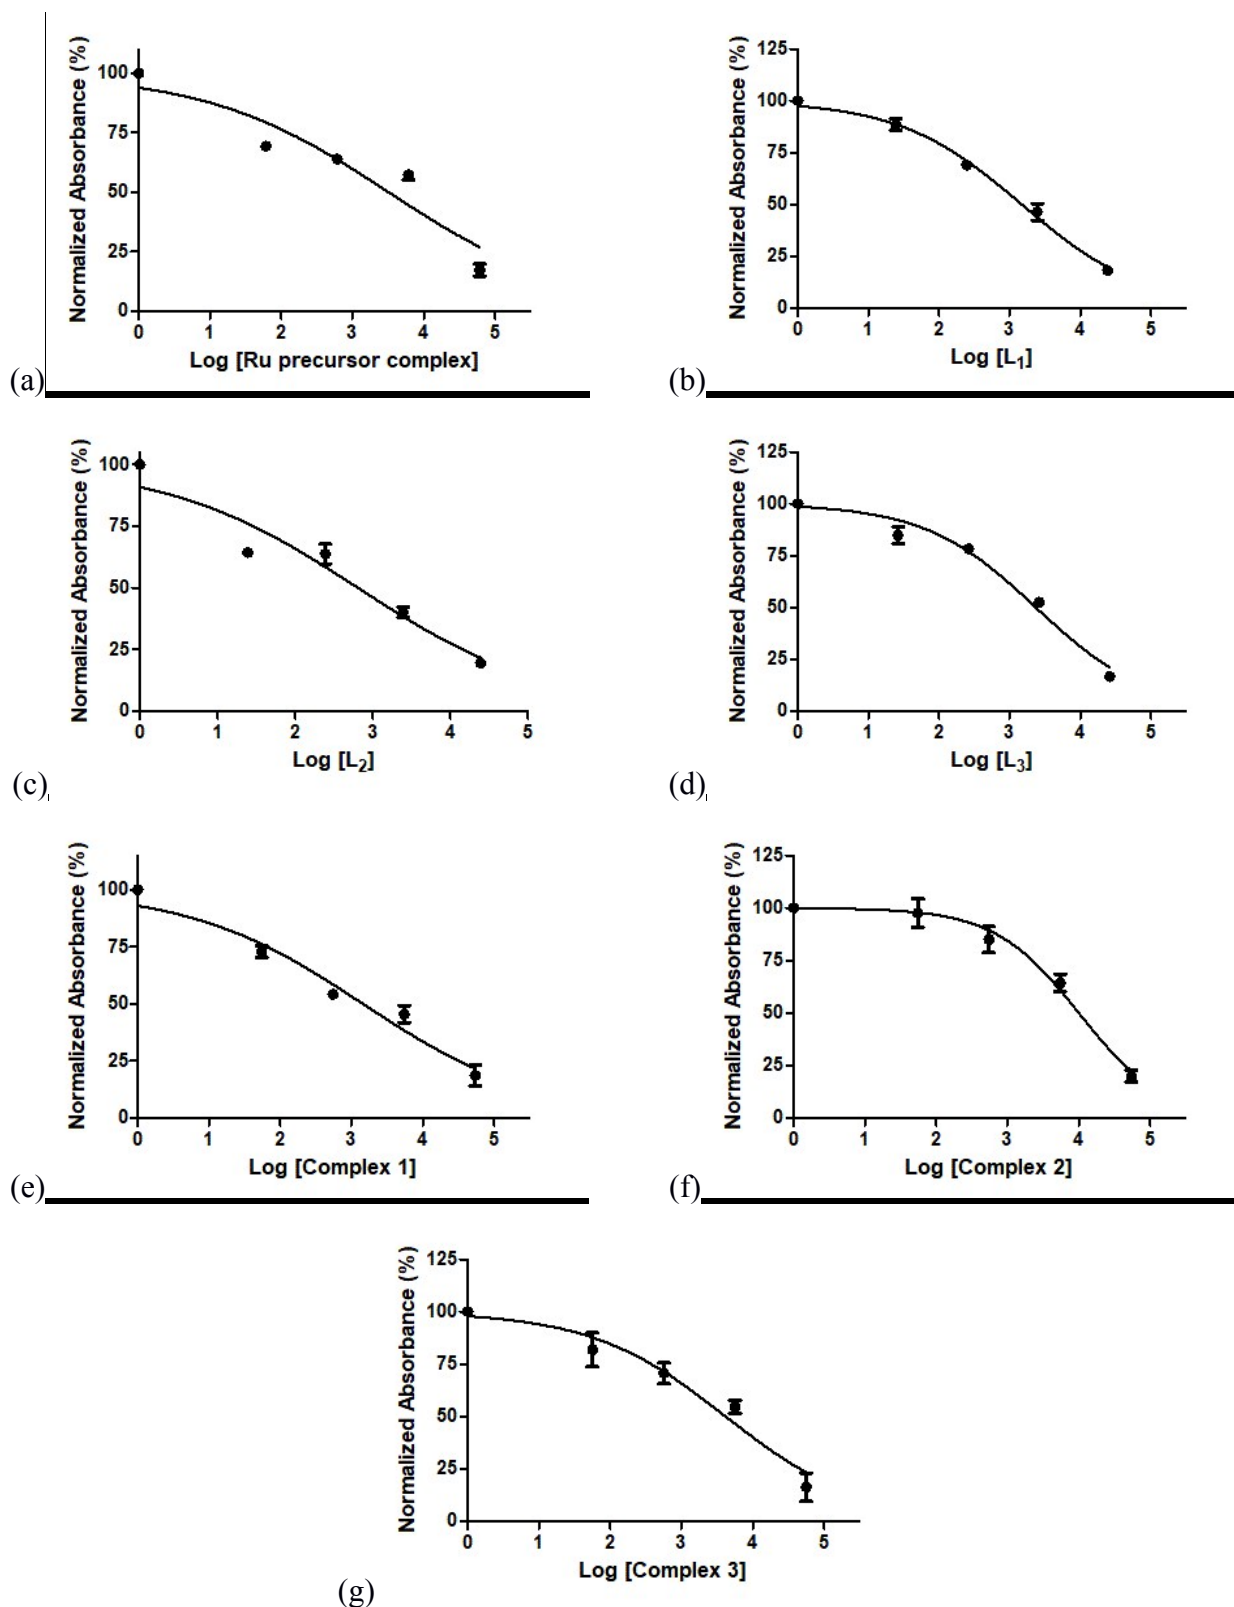

**Figure S99.** *In vitro* calculated IC<sub>50</sub> values of **Ru precursor complex** (a), **L<sub>1</sub>** (b), **L<sub>2</sub>** (c), **L<sub>3</sub>** (d), **complex 1** (e), **complex 2** (f) and **complex 3** (g) against MCF-7 cell lines measured by MTT assay after 48 h.

**Reference:**

(1) Kumar, A.; Kumar, A.; Gupta, R. K.; Paitandi, R. P.; Singh, K. B.; Trigun, S. K.; Hundal, M. S.; Pandey, D. S. *Journal of Organometallic Chemistry* **2016**, 801, 68.
